1           **SHORT TITLE**

2           GDU1 induces amino acid and stress responses

3

4           **TITLE**

5           *Induction of GLUTAMINE DUMPER1* reveals a link between amino acid export,  
6 abscisic acid, and immune responses

7

8           **AUTHORS**

9           Shi Yu<sup>1</sup>, Delasa Aghamirzaie<sup>1</sup>, Kim Harich<sup>2</sup>, Eva Collakova<sup>1</sup>, Ruth Grene<sup>1</sup>,  
10 Guillaume Pilot<sup>1,5</sup>

11

12           1: Virginia Tech, School of Plant and Environmental Sciences, Blacksburg, VA  
13 24060, USA.

14           2: Virginia Tech, Department of Biochemistry, Blacksburg, VA 24060, USA.

15

16           **FOOTNOTES**

17           S.Y., R.G and G.P. conceived and coordinated the study; S.Y. and G.P.  
18 performed experiments; K.H. and Y.S. developed the method and analyzed the  
19 hormone content in plant extract using LC-MS; D.A. and S.Y. analyzed the RNAseq  
20 data; E.C. and Y.S. ran the amino acid analyses; Y.S and G.P wrote the manuscript; all  
21 authors read and approved the final article; R.G. and G.P secured funding; G.P. agrees  
22 to serve as the author responsible for contact and ensures communication.

23           This work was supported by a startup package from Virginia Tech, the Virginia  
24 Agricultural Experiment Station and the Hatch Program of the National Institute of Food  
25 and Agriculture, U.S. Department of Agriculture, project VA-135908, VA-160087 (GP),  
26 and the National Science Foundation (USA), grants MCB-1052048 and IOS-1353366  
27 (GP), and MCB-1052145 (RG).

28 Present addresses: Shi Yu, Department of Neurology, University of Southern  
29 California, Los Angeles, CA 90089 USA; Delasa Aghamirzaie, Illumina, Inc, 200 Lincoln  
30 Centre Dr, Foster City, CA 94404 USA.

31 Author for contact: [gpilot@vt.edu](mailto:gpilot@vt.edu)

32

### 33 ONE SENTENCE SUMMARY

34 Genetically induced disturbance of amino acid homeostasis sequentially triggers  
35 responses to abiotic stresses and plant defenses to pathogens in Arabidopsis through  
36 undefined sensing mechanisms

37

38

### 39 ABSTRACT

40 Amino acid homeostasis in plants is finely tuned to match developmental needs  
41 and response to adverse environments. Over-expression of the single-transmembrane  
42 domain protein GLUTAMINE DUMPER1 (*GDU1*) leads to increased amino acid export,  
43 reduced growth and constitutive induction of immune responses. We used an inducible  
44 gene expression system to tease apart the primary and secondary effects caused by  
45 *GDU1*, and demonstrated that the primary effect is increasing amino acid export,  
46 followed by increased amino acid content and abscisic acid (ABA) response, and a  
47 subsequent activation of defense responses. The *GDU1*-mediated hypersensitivity to  
48 ABA partially depended on the E3 ubiquitin ligase LOSS-OF-GDU1 2 (*LOG2*), a known  
49 *GDU1* interactor. More importantly, the lysine catabolite pipecolic acid played a pivotal  
50 role in the *GDU1*-induced defense responses. This work unravels a novel relationship  
51 between amino acid transport, ABA and defense responses, potentially mediated by the  
52 *GDU1-LOG2* complex, critical for understanding how plants respond to amino acid  
53 imbalance.

54

### 55 INTRODUCTION

56 Apart from being the building blocks of proteins, amino acids play a central role in  
57 plant metabolism along with carbohydrates. Nitrogen enters metabolism through the  
58 synthesis of Gln from oxaloacetate, catalyzed by the glutamine synthetase / glutamate  
59 synthase cycle (Coruzzi et al., 2015). Amino acids are used for synthesis of specialized  
60 metabolites (Pratelli and Pilot, 2014), serve as non-toxic carriers of reduced nitrogen  
61 between the organs where they are synthesized to developing tissues. Translocation of  
62 amino acids within the plant and across intracellular membranes is mediated by  
63 dedicated transporters, which, for the most part, function either as proton-coupled  
64 importers or as exporters, and constitute the AAAP, APC and UMAMIT families  
65 (Dinkeloo et al., 2018). While the role of several of these transporters is elucidated  
66 (Tegeeder, 2014), the mechanisms controlling their expression and interactions with  
67 metabolic and hormonal pathways remain poorly characterized (Pratelli and Pilot,  
68 2014).

69 Using a forward genetic screening approach, we identified an unknown protein  
70 as being a putative regulator of amino acid export in Arabidopsis. The over-expression  
71 of this protein, GLUTAMINE DUMPER 1 (GDU1), led to the development of a  
72 pleiotropic phenotype whose most remarkable feature was the secretion of almost pure  
73 Gln from the leaves (Pilot et al., 2004). *gdu1-1D* plants are smaller than the wild type,  
74 accumulate more amino acids in the leaf, apoplasm, phloem and xylem (Pilot et al.,  
75 2004; Pratelli et al., 2010; Pratelli et al., 2012), and display enhanced amino acid export  
76 from cells (Pratelli et al., 2010), supporting a role of GDU1 in regulation of amino acid  
77 export and homeostasis. Less understood features of *gdu1-1D* plants included  
78 constitutive development of necrotic lesions on the leaves and induction of immune  
79 responses (Chen et al., 2010; Liu et al., 2010). Suppression of the phenotype, but not  
80 protein over-accumulation, by specific amino acid substitutions within the GDU1  
81 sequence (Yu et al., 2015) and by suppression of the activity of LOSS-OF-GDU1 2  
82 (LOG2) (Pratelli et al., 2012) show that this phenotype is not caused by any toxicity  
83 effect of GDU1 protein over-accumulation.

84 GDU1 is a single-transmembrane domain protein with no known functional  
85 domain, targeted to the plasma membrane and the endosomal compartments,  
86 belonging to a plant-specific family (Pratelli and Pilot, 2006). The conserved cytosolic  
87 domain of GDU1 interacts with the membrane-anchored ubiquitin ligases LOG2 and  
88 LOG2-LIKE UBIQUITIN LIGASES (LULs) (Pratelli et al., 2012). Both the interaction with  
89 LOG2 and the ubiquitin ligase activity of LOG2 are necessary for the development of  
90 the Gdu1D phenotype (Pratelli et al., 2012; Guerra et al., 2017), and suppression of  
91 *LOG2* expression restores many of the characteristics of the Gdu1D phenotype (Pratelli  
92 et al., 2012). In the current model, the GDU1-LOG2 complex is involved in the  
93 regulation of amino acid export by targeting an elusive regulator of amino acid exporters  
94 for degradation (Guerra et al., 2017). Substrates of LOG2 include GDU1 itself, probably  
95 an “incidental” substrate (Guerra et al., 2017), and RESPONSIVE TO  
96 DEHYDRATION21 (RD21), a cysteine-type endopeptidase possibly involved in abiotic  
97 stress responses (Kim and Kim, 2013). The phenotype of the *LOG2* knockout mutant  
98 *atairp3* shows that LOG2 acts as a positive regulator of ABA signaling, but its precise  
99 role remains to be defined (Kim and Kim, 2013). The putative connection between ABA  
100 and amino acid transport in *log2* is intriguing, because ABA signaling has not been  
101 previously linked to amino acid transport.

102 Cross-talk between phytohormones has been extensively described (Harrison,  
103 2012; Checker et al., 2018), and complex interactions between salicylic acid (SA) and  
104 ABA, representing typical biotic and abiotic response pathways, have also been  
105 uncovered. The reciprocal effects of ABA on SA are complex, and often appear  
106 contradictory and context-dependent: both negative (de Torres Zabala et al., 2009;  
107 Manohar et al., 2017) and positive effects (Seo and Park, 2010) have been reported.  
108 Little is known about the interactions between ABA and amino acids. It has been shown  
109 that ABA and drought can affect amino acid homeostasis both at the mRNA (Less and  
110 Galili, 2008; Urano et al., 2009) and amino acid content (Huang and Jander, 2017)  
111 levels. Glu or Gln treatment of Arabidopsis leaves and rice roots trigger defense  
112 responses using processes partially involving SA (Kadotani et al., 2016; Kan et al.,  
113 2017; Goto et al., 2020), and application of a low concentration of Leu induces some  
114 defense-related genes in Arabidopsis (Hannah et al., 2010). Despite these studies, the

115 interactions between amino acid metabolism and hormonal signaling pathways are not  
116 understood at the molecular level. The amino acid-related and stress-related  
117 phenotypes of *gdu1-1D* make the understanding of the role of GDU1 a valuable tool to  
118 study this problem.

119 The characteristics of the Gdu1D phenotype implies metabolic, transport and  
120 hormonal alterations. In this study, we sought to establish causality between these  
121 effects, notably whether transport alterations were (1) the primary effect of over-  
122 expression of *GDU1*, (2) due to disturbances in amino acid homeostasis, or (3)  
123 consequences of activation of stress response pathways. In particular, we wanted to  
124 assess the role of the ABA pathway and the role of the SA pathway in the Gdu1D  
125 phenotype. To answer these questions, we recapitulated the Gdu1D phenotype caused  
126 by over-expression of *GDU1* using an inducible gene expression system. After  
127 induction, the development of the phenotype was closely followed over time at the  
128 molecular, metabolic and physiological levels. The results allowed us to differentiate  
129 primary and secondary effects caused by overexpression of *GDU1* and infer causality  
130 between various phenotypes.

131  
132

133           **RESULTS**

134           **Induction of *GDU1* recapitulates the *Gdu1D* phenotype**

135           Because the *gdu1D* mutation caused a gain-of-function phenotype (i.e.,  
136 constitutive overexpression), we reasoned that inducible overexpression of the wild-type  
137 gene could recapitulate phenotypes of the *gdu1-1D* mutant. Sampling over time,  
138 following induction of *GDU1*, would enable us to determine the temporal sequence of  
139 events following induction of *GDU1*. Three independent Arabidopsis lines that express  
140 the *GDU1* gene under the control a dexamethasone-inducible promoter (pOp/LhGR  
141 system (Craft et al., 2005; Samalova et al., 2005), were constructed and brought to  
142 homozygosity (lines DEX1, DEX2, DEX3; Supplemental Text 3). Mature plants were  
143 sprayed with dexamethasone and studied over time. *GDU1* mRNA accumulation  
144 peaked between 6 and 12 h post induction (HPI), accumulating ~5,000 to ~10,000 times  
145 more than in the 4c-S7 control line (Figure 1A), an amount higher than in the  
146 constitutive *gdu1-1D* and *gdu1-2D* mutants (~500 and 250 times over-accumulation,  
147 respectively; Yu and Pilot, unpublished data). *GDU1* mRNA leveled off after 24 h to  
148 approximately 3,000 times the level of 4c-S7 until the end of the experiment.

149           To determine to which extent inducing *GDU1* expression recapitulates the  
150 *Gdu1D* phenotype, free amino acid content of leaves of the DEX2 and DEX3 lines was  
151 measured from the same plants as above. Amino acid levels started to increase after 12  
152 HPI, being 50% higher at 24 h and about 100% higher from 36 HPI compared to 4c-S7  
153 (Figure 1B, Supplemental Table 1). Most amino acids, except for Ala, Asp and Glu,  
154 were responsible for this increase (Supplemental Table 1). Other than Lys (15 fold  
155 increase) the amino acid levels increased 2-4 fold compared to the control at 96 HPI,  
156 and largely mirrored the amino acid levels of constitutive *GDU1* over-expressors  
157 examined in a previous study (Pilot et al., 2004). Total free amino acid levels in the  
158 apoplasm wash fluid were similar for the DEX1 and 4c-S7 plants (Supplemental Table  
159 2), but levels of many amino acids increased at 6 HPI, and stayed elevated until at least  
160 48 HPI (Asn, Gln, Gly, His, Ile, Leu, Phe, Pro, Ser, Thr and Val) or decreased (Asp, Glu  
161 and GABA) (Supplemental Table 2). The increase of Lys concentration was dramatic,  
162 about 75-fold compared to 4c-S7 at 48 HPI (Figure 1C; Supplemental Table 2). To test  
163 if the increase in apoplasmic amino acid concentration resulted from modification in  
164 amino acid transport, DEX1 plants were grown in liquid culture, treated with  
165 dexamethasone, and assayed for amino acid export. In these growth conditions,  
166 dexamethasone induced *GDU1* mRNA accumulation with a similar intensity and kinetics  
167 as for soil-grown plants (Figure 1D). Gln efflux of DEX1 started to increase significantly  
168 at 2 HPI, reaching levels similar to the constitutive over-expressor *gdu1-1D* (30% vs.  
169 36%) by 3 HPI (Figure 1E). Induction stimulated Pro and Leu export to the same extent  
170 as in *gdu1-1D* (Figure 1F).

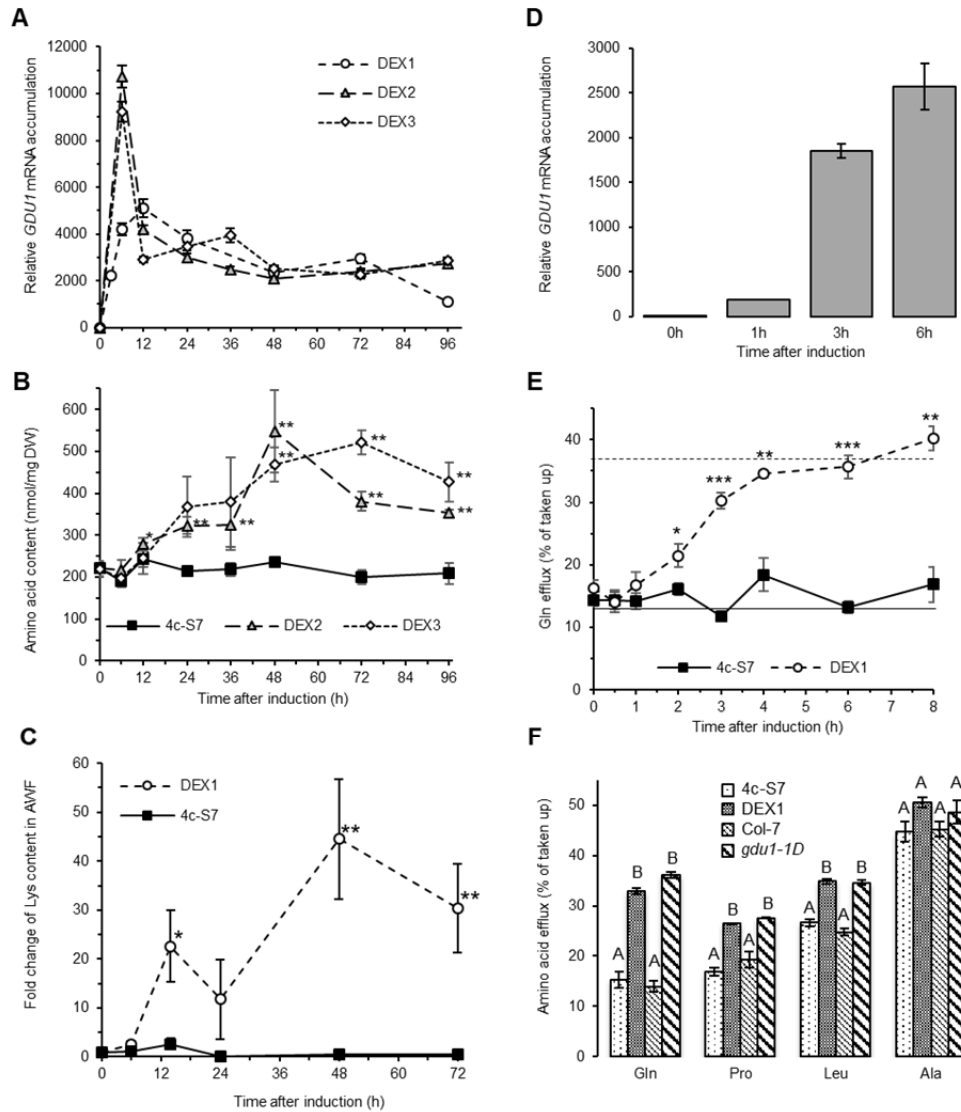

**Figure 1. Time course analysis of *GDU1* transcript and amino acid levels, and amino acid export after induction of *GDU1*.**  
**A.** Lines DEX1, DEX2, DEX3 and the pBIN-LhGR-N activator line 4c-S7 (control line) were grown for three weeks in soil, and sprayed with dexamethasone. *GDU1* mRNA accumulation was measured by qPCR over the course of four days after induction. Line DEX1 was tested in a separate experiment as lines DEX2 and DEX3. Relative levels are reported as fold change compared to the 4c-S7 line at each time point, set at 1. Error bars=SE, n=3 biological replicates. **B.** Free amino acid levels in whole leaves from the same samples as in A. Error bars=SE, n=3 biological replicates. Statistically different changes from the 4c-S7 line: t-test (\* p<0.1; \*\* p<0.05). **C.** Changes in Lys content in apoplasmic wash fluid (AWF) of lines DEX1 and 4c-S7 grown for four weeks on soil and sprayed with dexamethasone. Levels are reported as relative to those time 0 for each line, set at 1. Error bars=SE, n=4 biological replicates. Statistically different changes from the 4c-S7 line: t-test (\* p<0.1; \*\* p<0.05). **D, E and F.** The 4c-S7 and DEX1 lines were grown on half strength MS +1% sucrose for one week, followed by four additional days in liquid medium, and treated with 30  $\mu$ M dexamethasone for times indicated on the graphs. **D.** Fold changes in *GDU1* transcript levels in the DEX1 line compared to the 4c-S7 line at each time point (set at 1). Error bars = SE, n=3 biological replicates. **E.** Measurement of Gln efflux over time after *GDU1* induction. Statistically different changes from the 4c-S7 line: t-test (\* p<0.05, \*\* p<0.01, \*\*\* p<0.001). The dashed and plain horizontal lines correspond to the Gln efflux of *gdu1-1D* and Col-7 respectively, measured under the same conditions. Error bars=SE, n=3-6 biological replicates. **F.** Efflux of Gln, Pro, Leu, and Ala (measured for 20 min after 20 min uptake of 1 mmol.l<sup>-1</sup> of each amino acid) at three hours after dexamethasone treatment on the 4c-S7 and DEX1 lines, and in Col-7 and *gdu1-1D* lines. Different letters indicate significantly different results for each amino acid (ANOVA-Tukey, p<0.05). Error bars=SE, n=3 biological replicates.

172 White crystalline deposits were observed as soon as 3 days after  
173 dexamethasone induction (Figure 2B), and their size increased over time (data not  
174 shown), mimicking the Gln deposits at the hydathodes of the *GDU1* over-expressors  
175 (Pilot et al., 2004). To test whether dexamethasone-induced plants would display  
176 tolerance to toxic concentrations of amino acids similarly to the *GDU1* over-expressors  
177 (Pratelli and Pilot, 2007; Pratelli et al., 2010), plants were induced and grown on sterile  
178 medium containing 4 mM Ile. Roots of the DEX lines grew as well as *gdu1-1D* in  
179 presence of Ile and dexamethasone, while growth was inhibited similarly to Col-0 by Ile  
180 in absence of dexamethasone (Supplemental Figure 1).

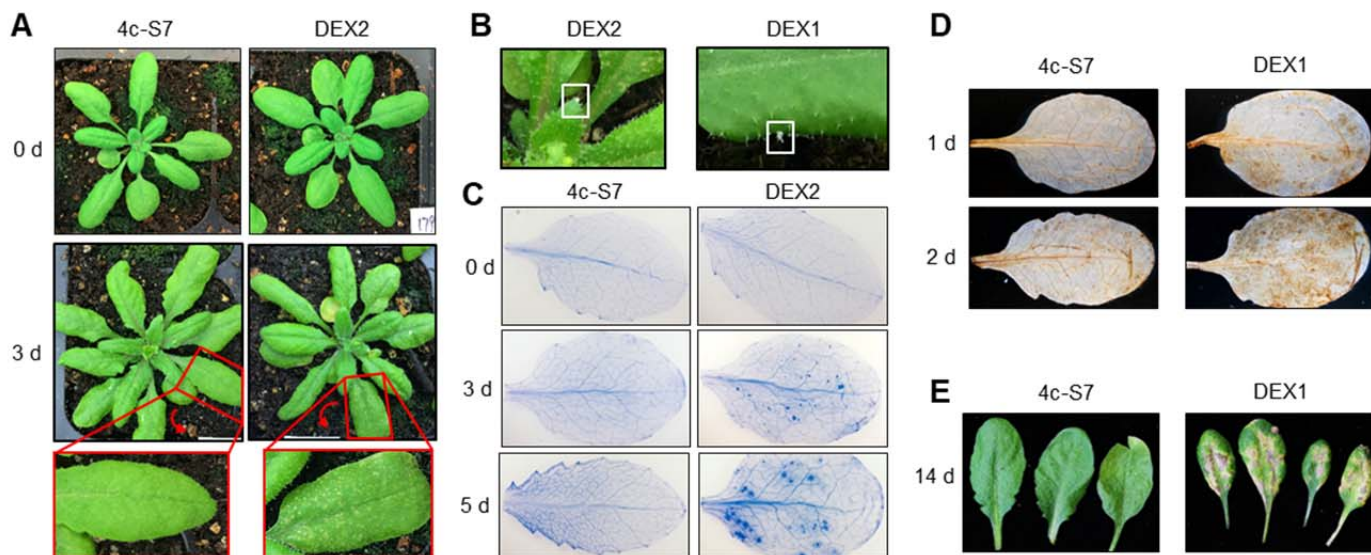

**Figure 2. Visible phenotypes of the DEX and 4c-S7 plants after spraying with dexamethasone.**

**A.** Picture of DEX2 and 4c-S7 plants at 0 and 3 days after induction. Red boxes: enlargement of the leaves at 3 days, showing the development of lesions in DEX2 only (arrows indicate the direction of rotation). **B.** Close-up view of leaves of DEX1 and DEX2, three days after induction, showing Gln secretion (white boxes). **C.** Leaves of 4c-S7 and DEX2 plants, 0, 3 and 5 days after induction, stained using Trypan blue to reveal cell death. **D.** Leaves of 4c-S7 and DEX1 plants, 1 and 2 days after induction, stained with diaminobenzidine to reveal the presence of ROS. **E.** Leaves of 4c-S7 and DEX1 plants, 14 days after induction (induction was repeated 7 days after the first spray).

181 Similar to the constitutive over-expressor *gdu1-1D* (Supplemental Figures 2A,B),  
182 necrosis spots on the whole area of the leaves were observed after three days post-  
183 dexamethasone induction on all DEX lines, but not on the 4c-S7 line (Figure 2A, insert).  
184 Such lesions can be a sign of cell death, which is often associated with the presence of  
185 reactive oxygen species (ROS) (Van Breusegem and Dat, 2006). Accordingly, ROS and  
186 cell death were detected after staining DEX1 leaves with 3,3'-diaminobenzidine (DAB)  
187 and Trypan blue, respectively (Pogany et al., 2009): ROS accumulated as soon as 24  
188 HPI (Figure 2D), while necrotic spots appeared after 3 days post induction (Figure 2C),  
189 and were comparable both in size and number to *gdu1-1D* (Supplemental Figure 2C).  
190 When DEX1 plants were sprayed twice with dexamethasone seven days apart to  
191 prolong the induction for 14 days, leaves of the DEX1 plants displayed extensive  
192 yellowing and parched areas, very similar to the older leaves of *gdu1-1D* (Figure 2E and  
193 Supplemental Figure 2A).

194 Altogether, these results demonstrate that induction of *GDU1* using the inducible  
195 pOp/LhGR system leads to a rapid and robust expression of *GDU1*, and recapitulates in

196 about 3-4 days the most identifiable characteristics of the *Gdu1D* phenotype, namely  
 197 increased amino acid export, tolerance and content, as well as development of lesions.

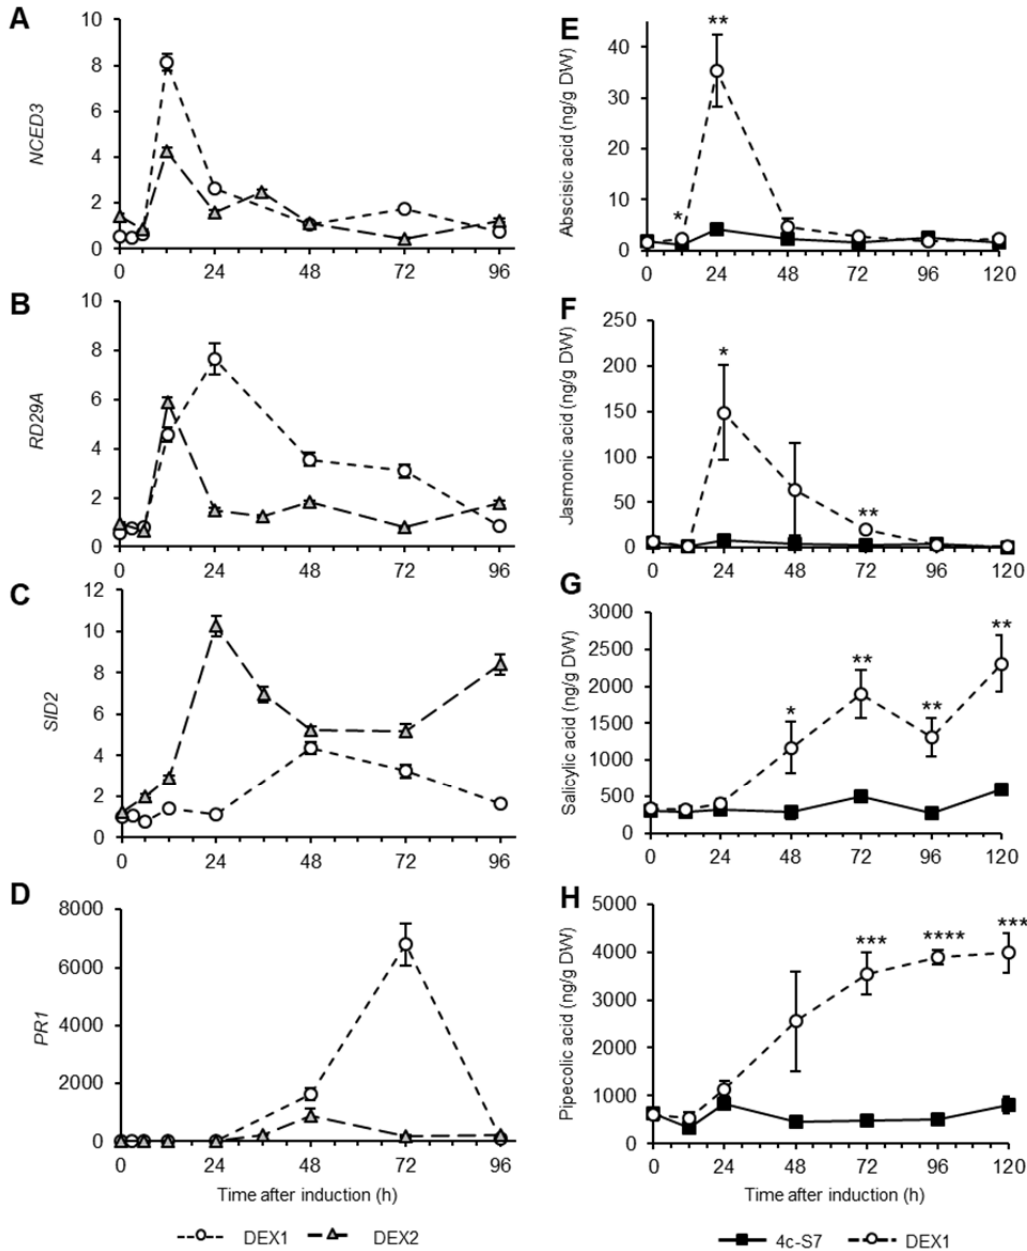

**Figure 3. Time course analysis of the expression of marker genes and of the accumulation of phytohormones following *GDU1* induction.**

**A to D.** DEX1 and DEX2 lines were induced in two separate experiments reported in Figure 1A. Data represent fold differences of the transcript levels for each gene relative to those in the control 4c-S7 line at the corresponding time point, set at 1. *NCED3* (A) and *RD29A* (B), markers for ABA synthesis and signaling; *SID2* (C) and *PR1* (D), markers for SA synthesis and signaling, respectively. Raw data are presented in Supplemental Figure 3. Error bars are SE, N=3 biological replicates. **E to H.** 4c-S7 and DEX1 plants were grown for three weeks in soil, sprayed with dexamethasone. Phytohormone levels was measured by LC-MS. (E) Abscisic acid; (F) Jasmonic acid; (G) Salicylic acid; (H) Pipepicolic acid. Error bars=SE, n=4 biological replicates. Statistically different results from 4c-S7: t-test (\* p<0.05, \*\* p<0.01, \*\*\* p<0.001, \*\*\*\* p<0.0001).

198



199 **Induction of *GDU1* activates ABA and defense pathways in a sequential**  
200 **way**

201 Lesions are often associated with cell death mediated by SA (Nimchuk et al.,  
202 2003), while long term ABA treatment is known to induce leaf yellowing (Wang et al.,  
203 2018). To determine the effect of *GDU1* induction on the activity of the SA and ABA  
204 pathways, mRNA accumulations of biosynthesis (*SID2*, *NCED3*) and response (*PR1*,  
205 *RD29A*) marker genes for SA and ABA respectively were measured over time. The  
206 kinetics of induction for each gene was slightly different between the DEX lines but  
207 followed the *GDU1* induction kinetics, and the same trends were observed: *NCED3*  
208 mRNA peaked first at about 12 HPI, followed by *RD29A* (12-24 HPI), *SID2* (24-48 HPI)  
209 and *PR1* (48-72 HPI) mRNAs (Figures 3A-D; Supplemental Figure 3A and 3B). The  
210 slower response of the DEX1 line upon induction allowed us use other marker genes to  
211 elucidate the induction of SA (*ICS2*, *PAL4*), ABA (*KIN1*, *COR15*, *CBF3*, *RAB18*), auxin  
212 (*IAA5*), jasmonate (*OPR3*, *PDF1.2A*) and ethylene (*ERS2*) pathways (Supplemental  
213 Table 3 for details of the genes). The response to ABA and SA was confirmed  
214 (Supplemental Figures 3A and 3B), while no strong and durable ethylene or auxin  
215 responses were detected. Synthesis of and response to jasmonate were induced from  
216 24 HPI and 72 HPI respectively (Supplemental Figure 3C). In good agreement with the  
217 results of the marker gene study, ABA and JA contents peaked at 24 HPI and declined  
218 back to the levels of 4c-S7 after 48-72 HPI (Figures 3E and 3F), while SA steadily  
219 accumulated over the time of the induction from 48 HPI (Figure 3G).

220 Pipecolic acid (Pip) is a transported compound synthesized from Lys, necessary  
221 for the establishment of systemic acquired resistance (SAR) (Navarova et al., 2012;  
222 Bernsdorff et al., 2016). Since Lys accumulates to high levels upon *GDU1* induction, the  
223 content of the mRNAs corresponding to the enzymes that catalyze the degradation of  
224 Lys and the conversion of Lys to Pip (*LKR-SDH* and *ALD1* genes respectively) were  
225 measured in the DEX1 line. *LKR-SDH* mRNA increased at 24 HPI, while *ALD1* mRNA  
226 accumulation peaked at 48 HPI with a remarkable 350-fold increase (Supplemental  
227 Figure 3D). At the same time, Pip content steadily increased over time, mirroring SA  
228 accumulation (Figure 3H). Interestingly, these hormonal responses occurred  
229 sequentially, well after the onset of the increase in amino acid export (2 HPI).  
230 Measurement of Gln uptake from plants treated by ABA, SA or Pip further proved that  
231 the increase in amino acid export was not triggered by these phytohormones  
232 (Supplemental Figure 4).

233 An unbiased transcriptomics approach confirmed our qPCR results, in that the  
234 primary responses of the transcriptome to *GDU1* induction is stress signaling, followed  
235 by ABA responses, and defense responses (Supplemental Text 1). Mining the genes  
236 induced at 7 h after induction did not uncover a specific pathway which could help  
237 explain the phenotype related to amino acid transport (Supplemental Files 2 and 3). We  
238 mainly found genes associated with the general GO terms “Regulation of transport”, and  
239 “Response to stimulus”, suggesting that, at that time point, the plant is initializing  
240 responses whose nature cannot be deduced from the data.

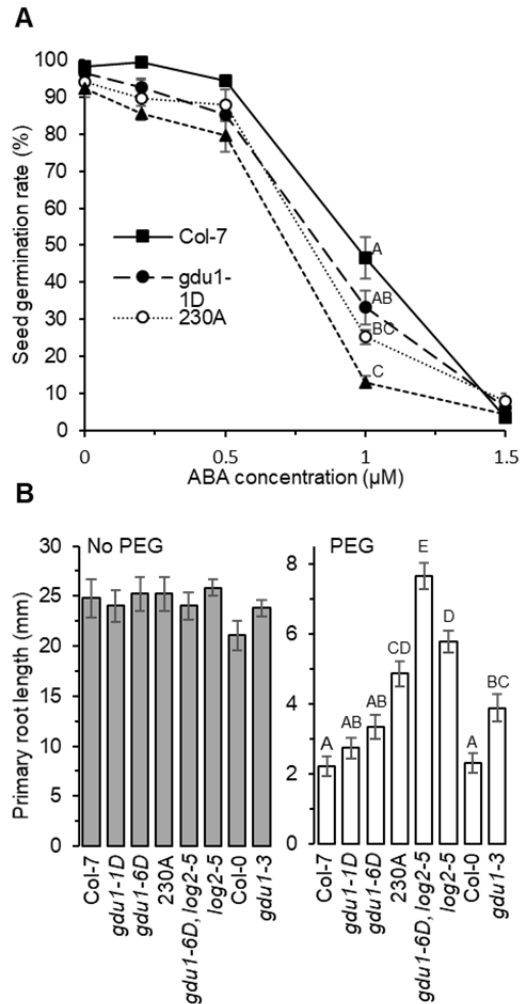

**Figure 4. Sensitivity to ABA and drought of plants altered in *GDU1* and/or *LOG2* expression.**  
**A.** Germination rate of Col-7, *gdu1-1D*, *gdu1-6D* and *gdu1-1D* expressing an amiRNA targeting *LOG2* (230A). Plants were grown for five days on half strength MS with 1% sucrose containing various concentrations of ABA indicated in the figure. Germination was assessed as cotyledon greening. Error bars=SE, n=3 biological replicates consisting of 60-240 seedlings each. **B.** Length of the primary root of plants grown for seven days on PEG-containing (mimic drought) or PEG-free (control) medium. *gdu1-3* is a T-DNA knockout mutant of *GDU1*, *log2-5* is a suppressor mutation of the *Gdu1D* phenotype of line *gdu1-6D* (Pratelli and Pilot, unpublished). Error bars=SE, n=18. Different letters for the PEG conditions indicate significantly different results (ANOVA-Tukey HSD,  $p < 0.05$ ).

241

## GDU1-induced hypersensitivity to ABA partially depends on LOG2

242 Since the ABA signaling pathway is induced by *GDU1* over-expression, we  
 243 hypothesized that *GDU1* over-expressor, but not the *gdu1-3* knockout mutant, should  
 244 therefore exhibit hypersensitivity to exogenous ABA. We observed that *GDU1*  
 245 overexpressors (Pratelli and Pilot, 2006), but not *gdu1-3*, were indeed hypersensitive to  
 246 ABA in a germination assay (Figure 4A; Supplemental Figure 5). The *LOG2* ubiquitin  
 247 ligase is a positive regulator of ABA signaling (Kim and Kim, 2013) and its activity is  
 248 stimulated upon interaction with *GDU1* (Pratelli et al., 2012; Guerra et al., 2017). To test  
 249 the involvement of *LOG2* into the *GDU1*-mediated ABA response, *LOG2* expression  
 250 was reduced by expressing an artificial miRNA targeting *LOG2* in the *gdu1-1D*  
 251 background (line 230A (Yu and Pilot, 2014)). The germination rate in presence of ABA

252 of this line was not different from the mutant rate (Figure 4A), suggesting that LOG2 is  
253 not indispensable in this specific ABA assay. On the contrary, lines in which *LOG2* or  
254 *GDU1* expression was suppressed or reduced, were less sensitive to simulated  
255 drought, which is an ABA-dependent process (Rowe et al., 2016), than wild type roots,  
256 while the *GDU1* over-expressors *gdu1-1D* and *gdu1-6D* displayed similar root length as  
257 the wild type (Figure 4B). Interestingly, root growth of lines 230A and *gdu1-6D log2-5*  
258 was less inhibited by drought than both the wild type and *gdu1-1D*, suggesting that  
259 knockdown/knockout of LOG2 activity is epistatic to *gdu1-1D* over-expression in this  
260 assay, but not in the ABA germination assay. The different results from these assays  
261 hints at GDU1 over-expression triggering LOG2-dependent and LOG2-independent  
262 ABA responses. In addition, LOG2 is likely not the only gene involved in the GDU1-  
263 mediated changes in amino acid transport and homeostasis: while suppression of LOG2  
264 activity in *GDU1* over-expressors brought free amino acid accumulation to wild type  
265 levels (Supplemental Figure 6), Gln uptake and efflux were still altered (Supplemental  
266 Figure 7). At the same time, suppression of *GDU1* or *LOG2* expression alone, did not  
267 affect free amino acid content (Supplemental Figure 6), which indicate that other GDUs  
268 (Pratelli and Pilot, 2006) or genes similar to LOG2 (Pratelli et al., 2012) may also be  
269 involved in the process and functionally complement those loss-of-function mutants.  
270 Therefore, the *GDU1*-induced effects on amino acid transport and content are not  
271 entirely dependent on LOG2, similar to *GDU1*-induced ABA responses reported above.

## 272 **Pip plays a pivotal role in the GDU1-induced defense responses**

273 In addition to developing lesions on leaves, *gdu1-1D* is about 50% smaller than  
274 wild type plants (Pilot et al., 2004), a phenotype which could result from constitutive  
275 activation of the SA pathway, similar to the *cpr* and *cep* mutants (Bowling et al., 1994;  
276 Silva et al., 1999; Gou et al., 2009; Mosher et al., 2010). To test for any causality  
277 between SA responses, smaller size and lesion development, SA levels were  
278 genetically decreased by crossing *gdu1-1D* plants with the *sid2-1* mutant, in which SA  
279 biosynthesis is dramatically reduced (Wildermuth et al., 2001), or by expressing the SA-  
280 degrading enzyme *NahG* (Delaney et al., 1994) (lines 344A and 344D). Presence of the  
281 *sid2-1* mutation or the *NahG* protein did not affect the expression of *GDU1*  
282 (Supplemental Figure 8), ABA levels (Supplemental Figure 9A) or Gln export  
283 (Supplemental Figure 10), but expectedly decreased the *PR1* mRNA accumulation  
284 (Supplemental Figure 8) and the content of SA and JA (Supplemental Figures 9B and  
285 9C). However, the *sid2-1* mutation or expression of *NahG* did not restore the size defect  
286 of *gdu1-1D* (Figure 5A; Supplemental Figure 11A). Similarly, levels of some amino acid,  
287 especially Lys, remained elevated in leaves of those lines (Figures 5B, 5C;  
288 Supplemental Table 3) and Gln was still secreted to *gdu1-1D* levels (Supplemental  
289 Figure 10). The activation of the SA pathway does not seem to be the cause of the  
290 reduced size and the increase in amino acid accumulation and secretion.

291 Interestingly, while the levels of ROS were reduced to identical or less than wild  
292 type levels by expression of *NahG* or the presence of the *sid2-1* mutation (Figure 5D),  
293 only expression of *NahG* suppressed the development of spontaneous cell death and  
294 lesions (Figure 5A, Supplemental Figure 11B). *NahG* activity has been shown to  
295 suppress the activation of both SA-dependent and SA-independent defense pathways

296 (Heck et al., 2003), implying that over-expression of *GDU1* activates both pathways, the  
 297 latter being critical for the development of lesions in *gdu1-1D*.

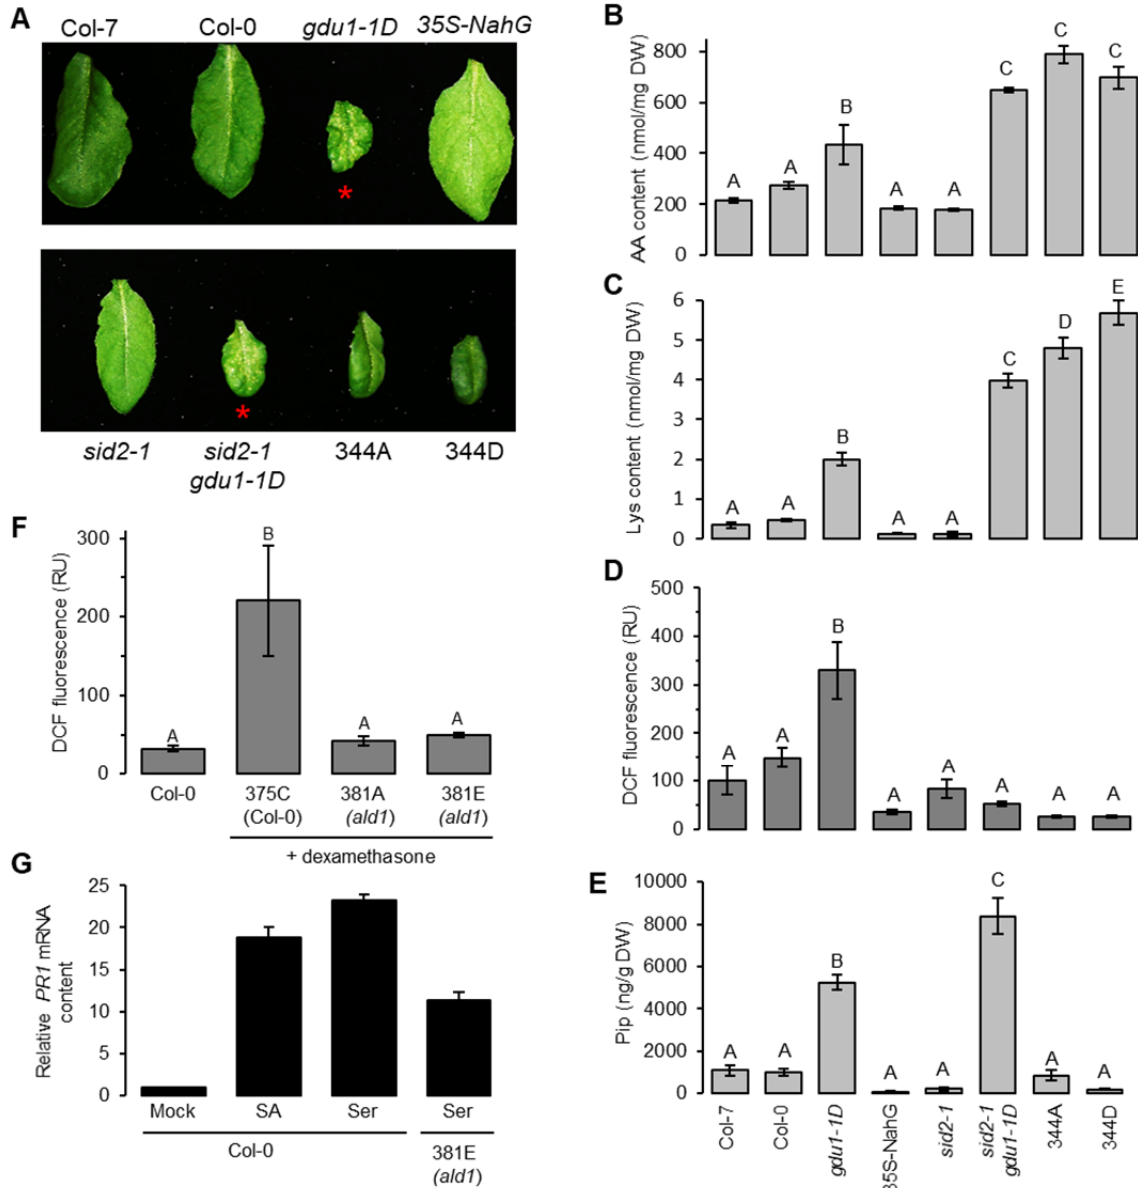

**Figure 5. Modification of the visible phenotypes of *gdu1-1D* plants by genetic suppression of defense responses.**

Wild type (Col-0, Col-7), *gdu1-1D*, *sid2-1* and the corresponding double mutant, plants over-expressing *NahG* (35S-*NahG*), and two independent lines coming from the transformation of *gdu1-1D* with the CsVMV-*NahG* construct (344A and 344D), were grown for five weeks in soil. **A.** Image of a typical leaf from each plant. Red asterisks indicate leaves with lesions. **B.** Total free amino acid (AA) levels in leaves of the plants. Error bars=SE, n=4, see also Supplemental Table 3. **C.** Free Lys levels in leaves of the plants. Error bars=SE, n=4. **D.** ROS levels in leaves of each of the lines; RU, relative units. Error bars=SE, n=3-8. **E.** Pip content in leaves of each of the lines. Error bars=SE, n=4. Different letters indicate significantly different results (ANOVA-Tukey HSD, p<0.05). **F.** Col-0 and *ald1* were transformed with a construct leading to the dexamethasone-inducible expression of *GDU1* (see Methods), to yield line 375C (Col-0), and two independent lines 381A and 381E (*ald1*). Lines were grown for four weeks on soil, sprayed with dexamethasone (+DEX) and leaf samples were collected after five days for ROS quantitation. Error bars=SE, n=4-12, different letters indicate significantly different results (Kruskal-Wallis - Dunn's tests, p<0.1). **G.** Plants were grown for eight days in half strength MS + 1 % sucrose and three additional days in liquid medium. Ser was added to the medium to a final concentration of 5 mM and samples were taken after 2 days. Treatment with 5  $\mu$ M SA for 2 days was used as a positive control. Fold changes in *PR1* transcript levels are expressed relative to the levels in Col-0 plants treated with 0.025% DMSO, set at 1. Error bars=SE, n=4 biological replicates.

298

299 Intrigued by this result, we sought to assess the involvement of Pip, whose  
300 content is elevated by *GDU1* over-expression. Compared to the wild type, Pip  
301 accumulation was elevated in the *gdu1-1D* and *sid2-1 gdu1-1D* mutants (even to a  
302 higher level than in *gdu1-1D*), while it was reduced to wild type levels by expression of  
303 *NahG* (Figure 5E). Accumulation of Pip effectively correlated with the presence of  
304 lesions (Figure 5A), but the content of Lys, precursor of Pip, did not, as it was enhanced  
305 by the *sid2-1* mutation or *NahG* enzyme (Figure 5C). To confirm the role of Pip in the  
306 *Gdu1D* phenotype, the *ald1* mutant, showing no  $\alpha$ -aminotransferase activity (Navarova  
307 et al., 2012), and wild type plants were transformed with a construct enabling the  
308 induction of *GDU1* by dexamethasone. Compared to the induction of *GDU1* expression  
309 in the wild type, inducing *GDU1* expression in the *ald1* mutants did not increase ROS  
310 accumulation (Figure 5F), and led to a lower *PR1* mRNA accumulation than in wild type  
311 plants (Supplemental Figure 12A), even if *GDU1* expression remained elevated  
312 (Supplemental Figure 12B). These results suggest that Pip is necessary for ROS  
313 accumulation, lesion development and the induction of SA-dependent and SA-  
314 independent pathways in the *Gdu1D* phenotype.

### 315 **Amino acid treatment triggers plant defense responses in a Pip dependent** 316 **manner**

317 Seeking a possible link between the *GDU1*-triggered increase in amino acid  
318 content and the subsequent activation of plant defense responses, plants expressing  
319 *GUS* under the control of the *PR1* promoter were grown in liquid medium and *GUS*  
320 activity was detected after treatment with SA, Pip, amino acids, or amino acid  
321 derivatives. Plants treated with 500  $\mu$ M Cys, Gln, Gly, Phe, Pro, Ser and Tyr showed a  
322 marked increase in *PR1-GUS* activity (Supplemental Figure 13A) in a dose-dependent  
323 manner, similar to Pip (Supplemental Figure 13B-D). This result was confirmed by a 20-  
324 fold increase in accumulation of *PR1* mRNA in response to Ser in wild type plants,  
325 which was reduced by 50% in *ald1* compared to the wild type (Figure 6G), showing that  
326 Pip contributes to the responses to amino acids.

327 GLUTAMATE RECEPTOR LIKE (GLR) proteins have been proposed to act as  
328 amino acid sensor candidates (Forde and Roberts, 2014; Gent and Forde, 2017). We  
329 tested the hypothesis that GLRs sense the amino acid secretion triggered by *GDU1*  
330 induction and trigger stress responses, as shown upon wounding (Toyota et al., 2018)  
331 (Supplemental Text 2). Our results establish that GLRs are not positive regulators of the  
332 signaling linking amino acid imbalance and defense responses upon *GDU1* over-  
333 expression, leaving Pip and SA as the most important players.  
334

## 335 DISCUSSION

336 Based on the phenotype of the corresponding over-expressors, the GDU1  
337 protein was previously proposed to be a direct or indirect regulator of amino acid export  
338 from plant cells (Pilot et al., 2004; Pratelli et al., 2010). In the current model, GDU1 and  
339 the ubiquitin ligase LOG2 control amino acid transport through ubiquitination of (an)  
340 unknown substrate(s) (Guerra et al., 2017). Activation of LOG2 upon interaction with  
341 GDU1 would lead to a rapid degradation of an inhibitor of amino acid exporter(s),  
342 causing an immediate increase in amino acid export. Other possible targets of the  
343 GDU1-LOG2 complex could be proteins involved in amino acid/nitrogen sensing and  
344 signaling, which, upon interaction with the complex, would trigger post-translational  
345 events leading to rapid changes in amino acid transport at the plasma membrane. The  
346 present work, initially aimed at finding out how the characteristics of the Gdu1D  
347 phenotype are linked to modification of amino acid transport, unraveled intriguing  
348 relationships between amino acid transport, metabolism, stress responses and  
349 immunity.

### 350 **The primary effect of GDU1 over-expression is an increase in amino acid** 351 **export, caused by post-translational processes**

352 It could be postulated that protein over-accumulation, leading to aggregation and  
353 cell death (Ueno et al., 2019), could be the reason of the observed stress and immune  
354 responses in *gdu1-1D* and the DEX lines. This hypothesis is invalidated by the  
355 observation that specific amino acid substitutions within the GDU1 sequence (Yu et al.,  
356 2015) or suppression of the activity of LOG2 (Pratelli et al., 2012) suppress the stress  
357 responses without affecting protein accumulation. Studying the effect of the induction of  
358 *GDU1* expression over time unequivocally showed that the first event is an increase in  
359 amino acid export by 2 HPI (Figures 1E and 1F), with no change in any other parameter  
360 detected at that early time point. To trigger the Gdu1D phenotype, *GDU1* mRNA needs  
361 to accumulate to levels over 100 folds that of wild type plants (Pilot et al., 2004), an  
362 amount reached at about 1 HPI (Figure 1D). Based on an average synthesis rate of 5  
363 amino acids per second and a reasonable trafficking time from the ER to the plasma  
364 membrane of 60 min (Hirschberg et al., 1998), the 158 amino acid-long GDU1 protein  
365 could be synthesized, folded, and accumulate at the plasma membrane in a little over  
366 an hour after being transcribed. Taking into account a protein synthesis time of 30 sec  
367 and a half-life time of an hour (Guerra et al., 2017), one can calculate that the  
368 accumulation of GDU1 protein at the plasma membrane necessary for triggering the  
369 Gdu1D phenotype is reached in about 3 hours after *GDU1* induction (data not shown).  
370 This value is in good agreement with the experimental data, which show that amino acid  
371 export reaches the level of the constitutive over-expressor at about 3 HPI (Figures 1E  
372 and 1F). The phenomenon triggered by *GDU1* induction is thus temporally concomitant  
373 with the accumulation of GDU1 at the plasma membrane, supporting the current model  
374 that the primary role of GDU1 is to control the activity of the LOG2 ubiquitin ligase  
375 (Guerra et al., 2017). Importantly, no *de novo* transcription or translation of other genes  
376 following induction would be necessary to explain this effect. This would explain why no  
377 signature or pathway related to amino acid/nitrogen metabolism or transport could be  
378 identified from the RNAseq data at 7HPI, which showed early responses to stress and

379 regulation of transport processes. Alternatively, this time point might already be too late  
380 to capture any amino acid transport responses at the transcriptome level.

### 381 **The abscisic acid pathway is directly affected by over-expression of GDU1**

382 The second notable effect of *GDU1* induction is the activation of ABA-related  
383 signaling and responses, occurring as soon as 12-24 HPI (Figures 3, Supplemental  
384 Figure 16). Interestingly, LOG2 was identified as a positive regulator of ABA signaling  
385 using a forward genetic screen (Kim and Kim, 2013). Our primary root growth assay  
386 under drought-mimic conditions also supports a positive role in ABA signaling not only  
387 for LOG2, but also for GDU1 (Figure 4B). While GDU1 over-expressors behave similarly  
388 to the wild type in this assay, they are hypersensitive to ABA in a germination test  
389 (Figure 4A), showing that both GDU1 and LOG2 are positive regulators of ABA/drought  
390 responses, potentially affecting overlapping processes. The working model for the  
391 GDU1-LOG2 complex can be expanded to a role in either sensitization of the plant to  
392 ABA or promoting ABA response. This model is consistent with the finding that RD21,  
393 encoding a Cys-protease induced by ABA and pathogen attack, is a substrate of LOG2  
394 (Kim and Kim, 2013). RD21 plays a role in promoting programmed cell death, and is a  
395 target of pathogen effectors in some plant pathosystems (LampI et al., 2013; Pogorelko  
396 et al., 2019). The combination of ABA sensitization and the stress induced by the  
397 modification in amino acid homeostasis could also trigger the ABA-mediated stress  
398 responses. The fact that the activity of the ABA pathway is transient upon *GDU1*  
399 induction, disappearing after ~48 HPI (Figure 3) and not prevalently observed in *gdu1-*  
400 *1D*, could suggest an antagonistic effect of the ABA and SA pathways (see below) or  
401 the existence of a feedback loop on the signaling exerted by the GDU1-LOG2 complex.

402 The increase in amino acid content in leaves is concomitant with the activation of  
403 ABA signaling, occurring at about 24 HPI (Figure 1B). Treatment of plants with ABA  
404 leads to an increase in free amino acid content, originating from protein degradation  
405 rather than from *de novo* synthesis (Huang and Jander, 2017). The decreased  
406 expression of the genes involved in amino acid biosynthetic pathways at 25 HPI  
407 (Supplemental Figure 15A) is compatible with the hypothesis that the amino acids  
408 accumulating after *GDU1* induction also come from an ABA-initiated protein  
409 degradation. The over-accumulation of Pro, Leu, Val and Ile in *gdu1-1D* (Pilot et al.,  
410 2004) and at 96 HPI is in good agreement with an effect of ABA-mediated signaling,  
411 which leads to increased accumulation of these amino acids during salt and drought  
412 stresses (Urano et al., 2009; Kovacs et al., 2011; Huang and Jander, 2017).  
413 Alternatively, these increases in amino acid levels could originate from the  
414 enhancement of amino acid export rather than ABA signaling, supported by the drastic  
415 increase in amino acid concentration in the apoplast after induction (Figure 1C and  
416 Supplemental Table 2). These responses could create a scarcity of amino acids in the  
417 cytoplasm, followed by modification of amino acid distribution in the cell or in the leaf. In  
418 response, protein degradation would be increased to replenish the stock of amino acids  
419 in the cytosol, leading to a global increase in amino acid content in the leaf without *de*  
420 *novo* synthesis. Rather than mutually exclusive, these scenarios could occur  
421 concomitantly with additive or synergistic effects.

422 Accumulation of the oxylipin hormone JA occurred concomitantly with ABA  
423 following induction of *GDU1* (Figure 3). JA has not been previously associated with

424 amino acid homeostasis, and this potential connection is an interesting area for future  
425 exploration. JA biosynthesis and signaling declined as SA biosynthesis and signaling  
426 were activated, correlating with the well-documented antagonism between SA and JA  
427 signaling. However, it is intriguing to consider that accumulation of JA is an early event  
428 in SA-dependent systemic acquired resistance in Arabidopsis and JA has been  
429 proposed as a phloem-mobile systemic signal for SAR, in addition to Pip (Truman et al.,  
430 2007). Considering that activation of *GDU1* induces an SAR-like response, the DEX  
431 lines could provide a useful genetic tool for precise understanding of context-dependent  
432 interactions between JA, ABA, Pip and SA signaling in SAR.

### 433 **Disturbance in amino acid homeostasis triggers plant defense responses**

434 Upon induction, SA and Pip accumulated and the corresponding pathways were  
435 activated after the ABA responses (Figure 3 and Supplemental Figure 3). Exogenous  
436 application of several amino acids could induce the expression of *PR1*, of which Cys,  
437 Gln, Pro, Gly, Phe and Ser were the most potent (Supplemental Figure 13). This result  
438 is in good agreement with previous studies, which showed that treating plants with Glu,  
439 Gln or Leu triggers defense responses (Hannah et al., 2010; Kan et al., 2015; Kadotani  
440 et al., 2016; Kan et al., 2017; Goto et al., 2020) and that amino acid disturbance of the  
441 knockout of the amino acid transporter AtLHT1 modulated SA responses (Liu et al.,  
442 2010). Increase in Lys content was larger and faster than any other amino acid upon  
443 *GDU1* induction, paralleled with increases in mRNA levels of Lys catabolic enzymes  
444 LKR-SDH and ALD1. *ALD1* encodes the enzyme catalyzing the first step of Pip  
445 synthesis (Navarova et al., 2012), a compound shown to orchestrate systemic acquired  
446 resistance and defense responses in concert with SA and ROS (Bernsdorff et al., 2016;  
447 Chen et al., 2018; Hartmann et al., 2018; Wang et al., 2018; Hartmann and Zeier,  
448 2019). Our experiments with mutants deficient in either SA or Pip pathways indicate that  
449 two parallel processes could induce defense responses, one directly initiated by an  
450 amino acid-SA branch, and the other mediated by a Lys-Pip branch. The fact that *gdu1-*  
451 *1D* lines in which SA biosynthesis was abolished still over accumulated Pip and  
452 developed lesions (Figure 6) suggests that lesions in *gdu1-1D* are developed by Pip-  
453 mediated, SA-independent pathways. Suppression of most defense responses by  
454 expression of NahG (Heck et al., 2003) completely abolished lesion development  
455 (Figure 6A) and Pip (but not Lys) accumulation, suggesting that NahG activity inhibits  
456 the conversion from Lys to Pip through ALD1. In addition, induction of *GDU1* in the *ald1*  
457 background failed to accumulate ROS (Figure 6F), indicating a pivotal role of ALD1 and  
458 Pip in the development of lesions and defense responses in the *Gdu1D* phenotype. The  
459 induction of *PR1* expression by treatment of the *ald1* mutant with exogenous amino  
460 acids (Figure 6G) suggests that SA-dependent pathways are nevertheless triggered  
461 upon amino acid disturbance. No overlap between the ABA and SA responses was  
462 observed (Figure 3), prompting the hypothesis that ABA signaling is inhibited by the  
463 increase in the activity of the SA-mediated defense responses. Such antagonism is also  
464 evident when plants are simultaneously treated by biotic and abiotic stresses (Gupta et  
465 al., 2017), or in studying ABA receptors (Manohar et al., 2017).

### 466 **Model for the development of *Gdu1D* phenotype**



467 One of the main advantages of chemically inducible systems (Moore et al., 2006)  
 468 is to allow tightly regulated temporal and spatial misexpression of the gene of interest,  
 469 which has been used to study plant development (Malinowski et al., 2011; Jiang and  
 470 Berger, 2017; Tao et al., 2017; Balanza et al., 2018) and hormonal responses (Skalak  
 471 et al., 2019), or to identify direct targets of transcription factors (Bargmann et al., 2013;  
 472 Yamaguchi et al., 2015; Brooks et al., 2019). In the present study, we utilized the two-  
 473 component pOp/LhGR system (Craft et al., 2005) to tackle a different problem common  
 474 in plant biology, namely a pleiotropic phenotype. The chemically inducible gene  
 475 expression system proved that the very first effect of *GDU1* over-expression is  
 476 increased amino acid export, to a level of temporal precision that we never  
 477 accomplished by comparing the wild type and constitutive over-expressors. This system  
 478 allowed us to separate the primary and secondary effects and to formulate testable  
 479 hypotheses on the causal relationships between them, providing a blueprint for  
 480 understanding the role of unknown proteins, whole over-expression would lead to a  
 481 recordable phenotype.

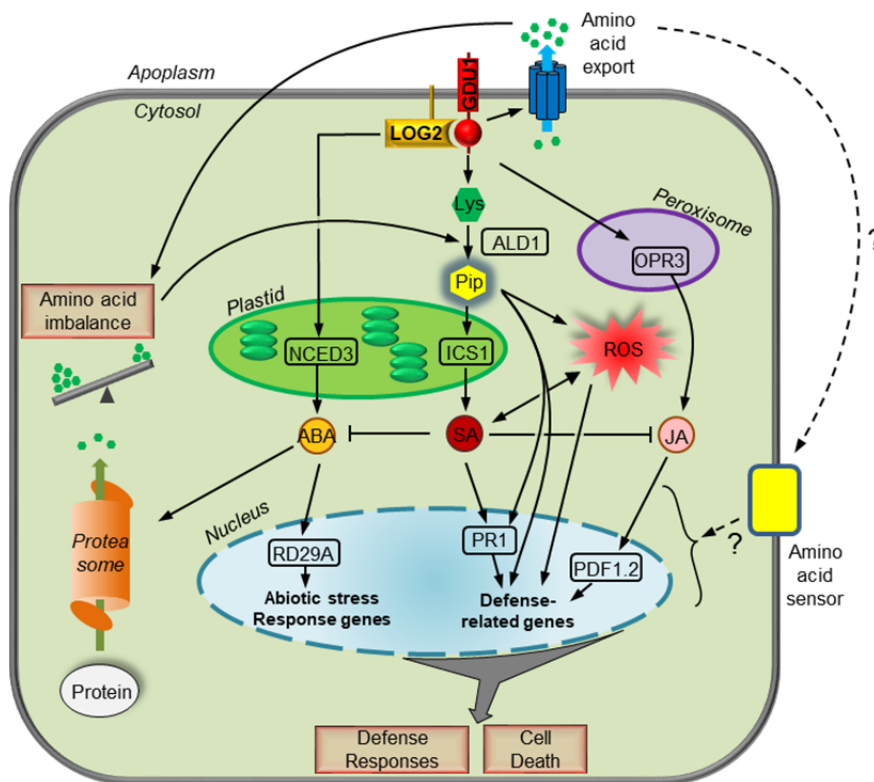

**Figure 6. Model for the processes activated upon *GDU1* over-expression.** Boxed genes correspond to the main marker genes assayed for expression in Figure 3 and Suppl. Figure 3. Arrows represent activation, and bars represent inhibition. Solid lines indicate confirmed links from this and previous studies, and dashed lines indicate possible links. See main text for details.

482  
 483  
 484  
 485

Our work leads to the model in which *GDU1* over-expression triggers in the following order: (1) Enhancement of amino acid export by controlling the activity of amino acid exporter(s). (2-1) Increase in amino acid export leading to more amino acids

486 in the apoplasm, phloem and xylem, and disturbance in amino acid homeostasis. (2-2)  
487 Increase in amino acid levels, particularly in Lys, which is converted to Pip by ALD1.  
488 Stimulation of ABA signaling and responses mediated by the induction of LOG2 via  
489 interaction with GDU1. (3-1) As hypothesized earlier (Sonawala et al., 2018), increases  
490 in levels of apoplasmic amino acid could be a signature for the presence of a pathogen  
491 and trigger immune responses. (3-2) Defense responses involving Pip, SA and JA; Pip  
492 exacerbates *PR1* and other defense-related gene expression in both SA-dependent and  
493 SA-independent manners, and directly or indirectly mediates ROS accumulation. (4)  
494 The accumulation of SA in turn inhibits the activity of ABA and JA responses (Figure 7).  
495 The small size of the plants and Gln secretion in *gdu1-1D* could not be suppressed by  
496 inhibiting defense responses (Supplemental Figure 11A), but only by downregulating  
497 *LOG2* expression (Pratelli et al., 2012). Interestingly, loss of *LOG2* activity does not  
498 completely suppress the *Gdu1D* phenotype (Supplemental Figures 6 and 7) suggesting  
499 that the effects of *GDU1* over-expression are mediated by *LOG2* and other proteins,  
500 potentially the *LOG2* homologs LULs (Pratelli et al., 2012). We hypothesize that  
501 disturbance in amino acid / nitrogen homeostasis is the reason for the growth reduction.  
502 The RNAseq analysis did not provide any clue that would help testing this hypothesis,  
503 possibly because these processes are masked by the large reprogramming of the  
504 transcriptome in response to stress.

505 Over-expression of *GDU1* leads to an interesting paradox: on the one hand, the  
506 increased amino acid content in leaves and various tissues provides an ideal source of  
507 carbon and nitrogen for pathogens, which could make plants more susceptible to  
508 pathogens (Zeier, 2013; Fagard et al., 2014; Mur et al., 2017; Sun et al., 2020). On the  
509 other hand, the augmented SA- and Pip-mediated defense response increases plant  
510 disease resistance. More research will be needed to tell which process will prevail (if  
511 any), based on assessment of disease susceptibility of *gdu1-1D* compared to the wild  
512 type, taking into account that the effect could be different for distinct pathogens, at  
513 different time points following induction.

## 514 **Conclusions**

515 Our work provides solid evidence that over-expression of *GDU1* triggers two  
516 parallel pathways most likely involving the *LOG2* ubiquitin ligase: post-translational  
517 regulation of amino acid export, and ABA- (and possibly JA-) mediated stress  
518 responses first visible at the level of the transcriptome. This brings further evidence for  
519 an interesting relationship between the co-regulation of ABA signaling and nitrogen  
520 metabolism, in which the *GDU1-LOG2* complex could play a critical role. *GDU1*-  
521 mediated disturbance in amino acid homeostasis, independent on pathogen attack,  
522 triggers plant immune responses involving Pip, SA, and JA. *GDU1* over-expressors and  
523 the induction system would provide a unique resource to study the interaction between  
524 amino acid homeostasis, stress-related phytohormones and plant immunity.

## 525 **MATERIAL AND METHODS**

### 526 **Plant material and growth**

527 *Arabidopsis thaliana* plants were grown under  $120 \mu\text{mol.m}^{-2}.\text{s}^{-1}$ , 22°C, 16/8 h  
528 light/dark cycle on soil (Mix of Sunshine Mix 1 and Pro-mix HP at a 1:1 ratio) and were

529 watered from below with 300 mg/l Miracle-Gro Fertilizer (24/8/16 NPK; Scotts,  
530 Marysville, OH, USA). *gdu1-3* (SALK\_132115) and *ald1* (SALK\_007673; (Alonso et al.,  
531 2003)) were obtained from the Arabidopsis Biological Resource Center. *glr3.3-1* and  
532 *glr3.4-1* were gifts from Dr. Edgar Spalding (University of Wisconsin at Madison, USA).  
533 pPR1-GUS was a gift from Dr. John McDowell (Virginia Tech, USA). The pOp/LhGR  
534 plasmid and the control line 4c-S7 were obtained from Dr. Ian Moore (Oxford, UK).  
535 *Arabidopsis thaliana* plants were transformed by the floral dip method (Clough and  
536 Bent, 1998) using *Agrobacterium tumefaciens* GV3101 (pMP90). Expression of *GDU1*  
537 in soil-grown plants was induced by spraying with a solution composed of 100  $\mu$ M  
538 dexamethasone (100 mM stock solution in DMSO) and 300 ppm silwet-77. For  
539 phytohormones, RNA, and metabolite analyses, each biological sample corresponded  
540 to 3-4 adult leaves from a single plant. For other experiments, plants were grown on  
541 solid half-strength Murashige and Skoog (MS) medium supplemented with 1% sucrose  
542 for 7 days, about 6-8 seedlings were transferred to one well of a 12-well plate containing  
543 3 ml of  $\frac{1}{2}$  MS + 1% sucrose grown for four more days in a growth chamber (same  
544 conditions as above) with gentle shaking (40 rpm). Induction was performed with 30  $\mu$ M  
545 dexamethasone and a biological replicate corresponded to plants from one well. pPR1-  
546 GUS seeds were grown on solid  $\frac{1}{2}$  MS + 1% sucrose medium 8 days, six seedlings  
547 were transferred into a well of a 24-well plate filled with 2 ml of liquid  $\frac{1}{2}$  MS + 1%  
548 sucrose and grown for three additional days under gentle shaking. Amino acids and  
549 other compounds were added at the indicated concentration to trigger *GUS* expression  
550 from stock solutions, staining was performed 2 days after treatment. The negative  
551 control was treated with 0.025% DMSO final (highest volume DMSO). For germination  
552 assays, about 150 seeds for each genotype were sowed on solid  $\frac{1}{2}$  MS + 1% sucrose  
553 medium supplemented with ABA at the indicated concentrations. After three-day  
554 stratification at 4°C, dishes were transferred to a growth chamber under 120  $\mu$ mol.m<sup>-2</sup>.s<sup>-1</sup>,  
555 22°C, 16/8 h light/dark cycle, and seed germination rate (cotyledon greening) was  
556 counted five days later. For root elongation assays on PEG, seeds were grown on solid  
557  $\frac{1}{2}$  MS, 1% sucrose medium for six days. Seedlings were transferred to solid  $\frac{1}{2}$  MS + 1%  
558 sucrose medium  $\pm$  polyethylene glycol PEG 8000, as described (van der Weele, 2000).  
559 Briefly, 250 g of PEG 8000 was dissolved in 500 ml of the liquid medium ( $\frac{1}{2}$  MS + 1%  
560 sucrose), and filtered through 0.22  $\mu$ m PES filter. Roughly 30 ml of PEG solution was  
561 poured on top of an equal volume of the solid medium. After 24 h, the solution was  
562 discarded, and the plate was used for the experiment. The average water potential of  
563 media with and without PEG 8000 was -0.88 MPa and -0.04 MPa, respectively  
564 (measured using a Decagon WP4 dew point potentiometer). Seedlings were then grown  
565 vertically under 120  $\mu$ mol.m<sup>-2</sup>.s<sup>-1</sup>, 22°C, 16/8 h light/dark cycle for a week; dishes were  
566 scanned, and primary root length was measured using ImageJ (Schneider et al., 2012).  
567 Mutant lines used in this study are listed in Supplemental Table 5. Samples collected  
568 from the same plants and at the same time for different analyses and assays are  
569 indicated in figure legends.

## 570 **Amino acid uptake in seedlings**

571 Measurements of amino acid transport were performed as previously described  
572 (Pratelli et al., 2010), with the following modifications for the data presented in  
573 Supplemental Figures 7 and 10: plants were grown for 7 days on solid, half-strength MS

574 medium containing 1% sucrose, and transferred to 1 ml of MS medium containing 1%  
575 sucrose for five more days in a 24-well plate without shaking; the solution was replaced  
576 by fresh medium, containing unlabeled Gln and 0.5  $\mu$ l of labeled  $^3\text{H}$ -Gln (18.5 kBq total).

### 577 **Nucleic acid manipulation and RNA seq analysis**

578 Details are given in Supplemental Text 3.

### 579 **Metabolite and hormone level measurements**

580 For amino acid analyses, samples were lyophilized, and homogenized with two 3  
581 mm glass beads in a bead beater twice for 60 s at 60Hz (Mini-Beadbeater-96, Biospec,  
582 USA). About 1.5 mg homogenized samples were transferred to a tube containing 10  $\mu$ l  
583 of 2 mM norvaline previously dried as an internal standard. Samples were extracted  
584 twice in 200  $\mu$ l 10 mM HCl and 200  $\mu$ l chloroform. The supernatants were pooled and  
585 transferred to a fresh tube for UPLC analysis. Derivatization and analysis were  
586 performed as described (Collakova et al., 2013). Hormone analyses in leaves were  
587 performed essentially as described (Forcat et al., 2008), with the following  
588 modifications. Samples were lyophilized, and homogenized with two 3 mm glass beads,  
589 by shaking in a bead beater twice for 60 sec at 60Hz. About 10 mg of homogenized  
590 samples were transferred to a tube and extracted twice in 400  $\mu$ l of a solution composed  
591 of 10% methanol and 1% acetic acid in water. The supernatants were pooled and  
592 analyzed by LC/MS-MS (see Supplemental Text 3).

593 For apoplastic washing fluid collection, *Arabidopsis* plants were grown on soil for  
594 four weeks. 6-8 adult leaves were collected from each plant by cutting from the base of  
595 the petiole, and infiltrated with a solution containing 240 mM sorbitol and 6  $\text{mg}\cdot\text{L}^{-1}$   
596 Lucifer Yellow CH dipotassium salt (LYCH, Sigma), which is used as a tracer to  
597 normalize apoplastic fluids (Derrick et al., 1992). The leaves were then stacked and  
598 rolled into a 5 ml tip, inserted into a 15 ml conical tube. The apoplastic wash was  
599 recovered by centrifugation at 22°C for 5 min at 400xg. LYCH concentration was  
600 assessed in a microplate reader (Synergy4, BioTek, USA) using an excitation of 428 nm  
601 and emission of 536 nm at room temperature. The intactness of the apoplastic wash  
602 fluids was confirmed by measuring hexose phosphate isomerase activity as described  
603 (Dannel et al., 1995).

### 604 **Histochemical staining**

605 GUS activity was revealed by histochemical staining, performed as described  
606 (Lagarde et al., 1996). ROS staining by diaminobenzidine and cell death staining were  
607 performed as described (McDowell et al., 2011).

### 608 **Reactive oxygen species measurement**

609 Measurement of ROS was performed as described (Umbach et al., 2012) with  
610 the following modifications. Leaves were excised and incubated in 3 ml of a solution  
611 containing 20  $\mu\text{M}$  2',7'-dichlorofluorescein diacetate, 10% MS and 0.1% Tween-20 in a  
612 12-well plate in the dark for 30 min at room temperature. Leaves were transferred to a  
613 fresh tube, dried at 80°C and weighed. The liquid medium was separated in four 200  $\mu$ l  
614 aliquots, transferred to a 96-well plate and the fluorescence was measured with

615 excitation at 488 nm and emission at 525 nm using a Synergy4 microplate micro plate  
616 reader.

### 617 **Supplemental Material**

618 Supplemental Figure 1. Root length analysis of Ile tolerance of the DEX lines.

619 Supplemental Figure 2. Phenotype of the *gdu1-1D* and Col-7 leaves.

620 Supplemental Figure 3. Expression analysis by qRT-PCR of marker genes at  
621 different time points following GDU1 induction.

622 Supplemental Figure 4. Gln uptake and efflux of plants treated by ABA, SA or  
623 Pip.

624 Supplemental Figure 5. Response of the *gdu1-3* knockout mutant to ABA.

625 Supplemental Figure 6. Amino acid content in leaves of plants with modified  
626 expression in GDU1 and LOG2.

627 Supplemental Figure 7: Gln uptake and efflux in plants with misexpression in  
628 GDU1 and LOG2.

629 Supplemental Figure 8. Levels of GDU1 and PR1 transcripts in *gdu1-1D* plants,  
630 in which defense responses have been suppressed by genetic approaches.

631 Supplemental Figure 9. Phytohormone content in *gdu1-1D* plants in which  
632 defense responses have been suppressed by genetic approaches.

633 Supplemental Figure 10. Gln uptake of *gdu1-1D* plants in which defense  
634 responses have been suppressed by genetic approaches.

635 Supplemental Figure 11. Picture of *gdu1-1D* plants in which defense responses  
636 have been suppressed by genetic approaches.

637 Supplemental Figure 12. PR1 and GDU1 expression in mutants harboring a  
638 dexamethasone-inducible expression of GDU1 construct after treatments with  
639 dexamethasone.

640 Supplemental Figure 13. GUS activity in pPR1-GUS plants treated with various  
641 amino acids, and compounds.

642 Suppl. figure 14. Analysis of transcriptomic changes for induced DEX plants and  
643 the *gdu1-1D* mutant.

644 Supplemental Figure 15. Mapman analysis of transcriptome response to GDU1  
645 over-expression.

646 Supplemental Figure 16. Average fold changes of transcript levels of 40 genes,  
647 used as a marker for each indicated treatment.

648 Supplemental Figure 17. Analysis of effects of suppressing the expression of  
649 GLRs on the response to Ser and to GDU1 induction.

650 Supplemental Figure 18. Effect of treatments with GLR antagonists on  
651 dexamethasone-treated 4c-S7 and DEX1.

652 Supplemental Figure 19. Maps of constructs used in this study.

653 Supplemental File 1. RNAseq output and clustering analysis.

654 Supplemental File 2. GO analysis of each gene clusters.

655 Supplemental File 3: Analysis of the clusters using the signature tool from  
656 Genevestigator

657 Supplemental File 4: Marker search using Genevestigator for various stresses  
658 and pathways.

659 Supplemental File 5: Fold changes of stress and nitrogen metabolism genes in  
660 response to GDU1 induction.

661 Supplemental File 6: Signature analysis of the nitrogen metabolism genes using  
662 Genevestigator.

663 Supplemental Table 1: Amino acid content in leaves of induced and non-induced  
664 plants.

665 Supplemental Table 2: Amino acid composition in the apoplasm wash fluid.

666 Supplemental Table 3: Marker genes used for qRT-PCR analysis.

667 Supplemental Table 4: Amino acid content in leaves of SA-related crosses and  
668 transformations.

669 Supplemental Table 5: Plant lines used in this study.

670 Supplemental Table 6: Sequences of the oligonucleotides used for this work.

671 Supplemental Table 7: TOPHAT statistics.

672 Supplemental Text 1: Untargeted transcriptomic analysis unravels the transition  
673 from ABA to defense responses.

674 Supplemental Text 2: GLRs are not positive regulators of the events downstream  
675 from GDU1 induction.

676 Supplemental Text 3: Supplemental Material and Methods

677

## 678 **ACCESSION NUMBERS**

679 Sequence data from this article can be found in the EMBL/GenBank data  
680 libraries under accession numbers AT4G31730 (GDU1), AT3G09770 (LOG2). RNAseq  
681 output data can be found in the GEO data library under the accession number XXXXXX.

682

## ACKNOWLEDGEMENTS

683 The authors thank Dr. Ryan Stewart (Virginia Tech, USA) and Dr. Josh Heitman  
684 (North Carolina State University, USA) for water potential readings, Dr. Edgar Spalding  
685 (University of Wisconsin at Madison, USA) for the *glr3.3-1*, *glr3.4-1* lines, Dr. John  
686 McDowell (Virginia Tech, USA) for the pPR1-GUS line, and Dr. Ian Moore (University of  
687 Oxford, UK) for sharing the dexamethasone inducible constructs and plant lines, Dr.  
688 Cynthia Denbow and Dr. John McDowell for critical reading of the manuscript.  
689

690

## FIGURE LEGENDS

691

692 **Figure 1. Time course analysis of *GDU1* mRNA accumulation, amino acid**  
693 **content, and amino acid export after induction of *GDU1*.**

694 **A.** Lines DEX1, DEX2, DEX3 and the pBIN-LhGR-N activator line 4c-S7 (control  
695 line) were grown for three weeks on soil, and sprayed with dexamethasone. *GDU1*  
696 mRNA accumulation was measured by qPCR over the course of four days after  
697 induction. Line DEX1 was tested in a separate experiment as lines DEX2 and DEX3.  
698 Relative accumulations are reported as fold change compared to the 4c-S7 line at each  
699 time point, set at 1. Error bars=SE, n=3 biological replicates. **B.** Free amino acid content  
700 in whole leaves from the same samples as in A. Error bars=SE, n=3 biological  
701 replicates. Statistically different from the 4c-S7 line: t-test (\* p<0.1; \*\* p<0.05). **C.**  
702 Change in Lys content in apoplasmic wash fluid (AWF) of lines DEX1 and 4c-S7 grown  
703 for four weeks on soil and sprayed with dexamethasone. Content was reported to the  
704 content at time 0 for each line, set at 1. Error bars=SE, n=4 biological replicates.  
705 Statistically different from the 4c-S7 line: t-test (\* p<0.1; \*\* p<0.05). **D, E and F.** The 4c-  
706 S7 and DEX1 lines were grown on half strength MS +1% sucrose for one week,  
707 followed by four additional days in liquid medium, and treated with 30  $\mu$ M  
708 dexamethasone for times indicated on the graphs. **D.** Fold change in *GDU1* mRNA  
709 content in the DEX1 line compared to the 4c-S7 line at each time point (set at 1). Error  
710 bars = SE, n=3 biological replicates. **E.** Measurement of Gln efflux over time after *GDU1*  
711 induction. Statistically different from the 4c-S7 line: t-test (\* p<0.05, \*\* p<0.01, \*\*\*  
712 p<0.001). The dashed and plain horizontal lines correspond to the Gln efflux of *gdu1-1D*  
713 and Col-7 respectively, measured in the same conditions. Error bars=SE, n=3-6  
714 biological replicates. **F.** Efflux Gln, Pro, Leu, and Ala (measured for 20 min after 20 min  
715 uptake of 1 mmol.l<sup>-1</sup> of each amino acid) at three hours after dexamethasone treatment  
716 on the 4c-S7 and DEX1 lines, and in Col-7 and *gdu1-1D* lines. Different letters indicate  
717 significantly different results for each amino acid (ANOVA-Tukey, p<0.05). Error  
718 bars=SE, n=3 biological replicates.  
719

720

721 **Figure 2. Phenotype of the DEX and 4c-S7 plants after spraying with**  
722 **dexamethasone.**

723 **A.** Picture of DEX2 and 4c-S7 plants at 0 and 3 days after induction. Red boxes:  
724 enlargement of the leaves at 3 days, showing the development of lesions in DEX2 only  
725 (arrows indicate the direction of rotation). **B.** Close-up view of leaves of DEX1 and  
DEX2, three days after induction, showing Gln secretion (white boxes). **C.** Leaves of 4c-

726 S7 and DEX2 plants, 0, 3 and 5 days after induction, stained using Trypan blue to  
727 reveal cell death. **D.** Leaves of 4c-S7 and DEX1 plants, 1 and 2 days after induction,  
728 stained with diaminobenzidine to reveal presence of reactive oxygen species. **E.** Leaves  
729 of 4c-S7 and DEX1 plants, 14 days after induction (induction was repeated 7 days after  
730 the first spray).

731  
732 **Figure 3. Time course analysis of the expression of marker genes and of**  
733 **the accumulation of hormones following *GDU1* induction.**

734 **A to D.** DEX1 and DEX2 lines were induced in two separate experiments  
735 reported in Figure 1A. Data represent fold difference of the mRNA accumulations of  
736 each gene, relative to the corresponding mRNA content in the control 4c-S7 line at the  
737 corresponding time point, set at 1. *NCED3* (**A**) and *RD29A* (**B**), markers for ABA  
738 synthesis and signaling; *SID2* (**C**) and *PR1* (**D**), markers for SA synthesis and signaling,  
739 respectively. Raw data are presented in Supplemental Figure 3. Error bars are SE, N=3  
740 biological replicates. **E to F.** 4c-S7 and DEX1 plants were grown for three weeks on soil,  
741 sprayed with dexamethasone. Hormone content was measured by LC-MS. (**E**) Abscisic  
742 acid; (**F**) Jasmonic acid; (**G**) Salicylic acid; (**H**) Pipecolic acid. Error bars=SE, n=4  
743 biological replicates. Statistically different from 4c-S7: t-test (\* p<0.05, \*\* p<0.01, \*\*\*  
744 p<0.001, \*\*\*\* p<0.0001).

745  
746 **Figure 4. Sensitivity to ABA and drought of plants altered in *GDU1* and/or**  
747 ***LOG2* expression.**

748 **A.** Germination rate of Col-7, *gdu1-1D*, *gdu1-6D* and *gdu1-1D* expressing an  
749 amiRNA targeting *LOG2* (230A). Plants were grown for five days on half strength MS  
750 with 1% sucrose containing various concentrations of ABA indicated in the figure.  
751 Germination was assessed as cotyledon greening. Error bars=SE, n=3 biological  
752 replicates consisting of 60-240 seedlings each. **B.** Length of the primary root of plants  
753 grown for seven days on PEG-containing (mimic drought) or PEG-free (normal)  
754 medium. *gdu1-3* is a T-DNA knockout mutant of *GDU1*, *log2-5* is a suppressor mutation  
755 of the *Gdu1D* phenotype of line *gdu1-6D* (Pratelli and Pilot, unpublished). Error  
756 bars=SE, n=18. Different letters for the PEG conditions indicate significantly different  
757 results (ANOVA-Tukey HSD, p<0.05).

758  
759 **Figure 5. Modification of the phenotype of *gdu1-1D* plants by genetic**  
760 **suppression of defense responses.**

761 Wild type (Col-0, Col-7), *gdu1-1D*, *sid2-1* and the corresponding double mutant,  
762 plants over-expressing *NahG* (35S-NahG), and two independent lines coming from the  
763 transformation of *gdu1-1D* with the CsVMV-NahG construct (344A and 344D), were  
764 grown for five weeks on soil. **A.** Picture of a typical leaf from each plant. Red asterisks  
765 indicate leaves with lesions. **B.** Total free amino acid (AA) content in leaves of the  
766 plants. Error bars=SE, n=4, see also Supplemental Table 3. **C.** Free Lys content in  
767 leaves of the plants. Error bars=SE, n=4. **D.** Reactive oxygen species levels in leaves of  
768 each of the lines; RU, relative units. Error bars=SE, n=3-8. **E.** Pip content in leaves of  
769 each of the lines. Error bars=SE, n=4. Different letters indicate significantly different  
770 results (ANOVA-Tukey HSD, p<0.05). **F.** Col-0 and *ald1* were transformed with a  
771 construct leading to the dexamethasone-inducible expression of *GDU1* (see Methods),



772 to yield line 375C (Col-0), and two independent lines 381A and 381E (*ald1*). Lines were  
773 grown for four weeks on soil, sprayed with dexamethasone (+DEX) and leaf samples  
774 were collected after five days for ROS quantitation. Error bars=SE, n=4-12, different  
775 letters indicate significantly different results (Kruskal–Wallis - Dunn's tests,  $p < 0.1$ ). **G.**  
776 Plants were grown for eight days in half strength MS + 1 % sucrose and three additional  
777 days in liquid medium. Ser was added to the medium to a final concentration of 5 mM  
778 and samples were taken after 2 days. Treatment with 5  $\mu$ M SA for 2 days was used as a  
779 positive control. Fold change in *PR1* mRNA content is expressed compared to the  
780 accumulation in Col-0 plants treated with 0.025% DMSO, set at 1. Error bars=SE, n=4  
781 biological replicates.

782  
783 **Figure 6. Model for the processes activated upon *GDU1* over-expression.**  
784 Boxed genes correspond to the main marker genes assayed for expression in Figure 3  
785 and Supplemental Figure 3. Arrows represent activation, and bars represent inhibition.  
786 Solid lines indicate confirmed links from this and previous studies, and dashed lines  
787 indicate possible links. See main text for details.  
788

789

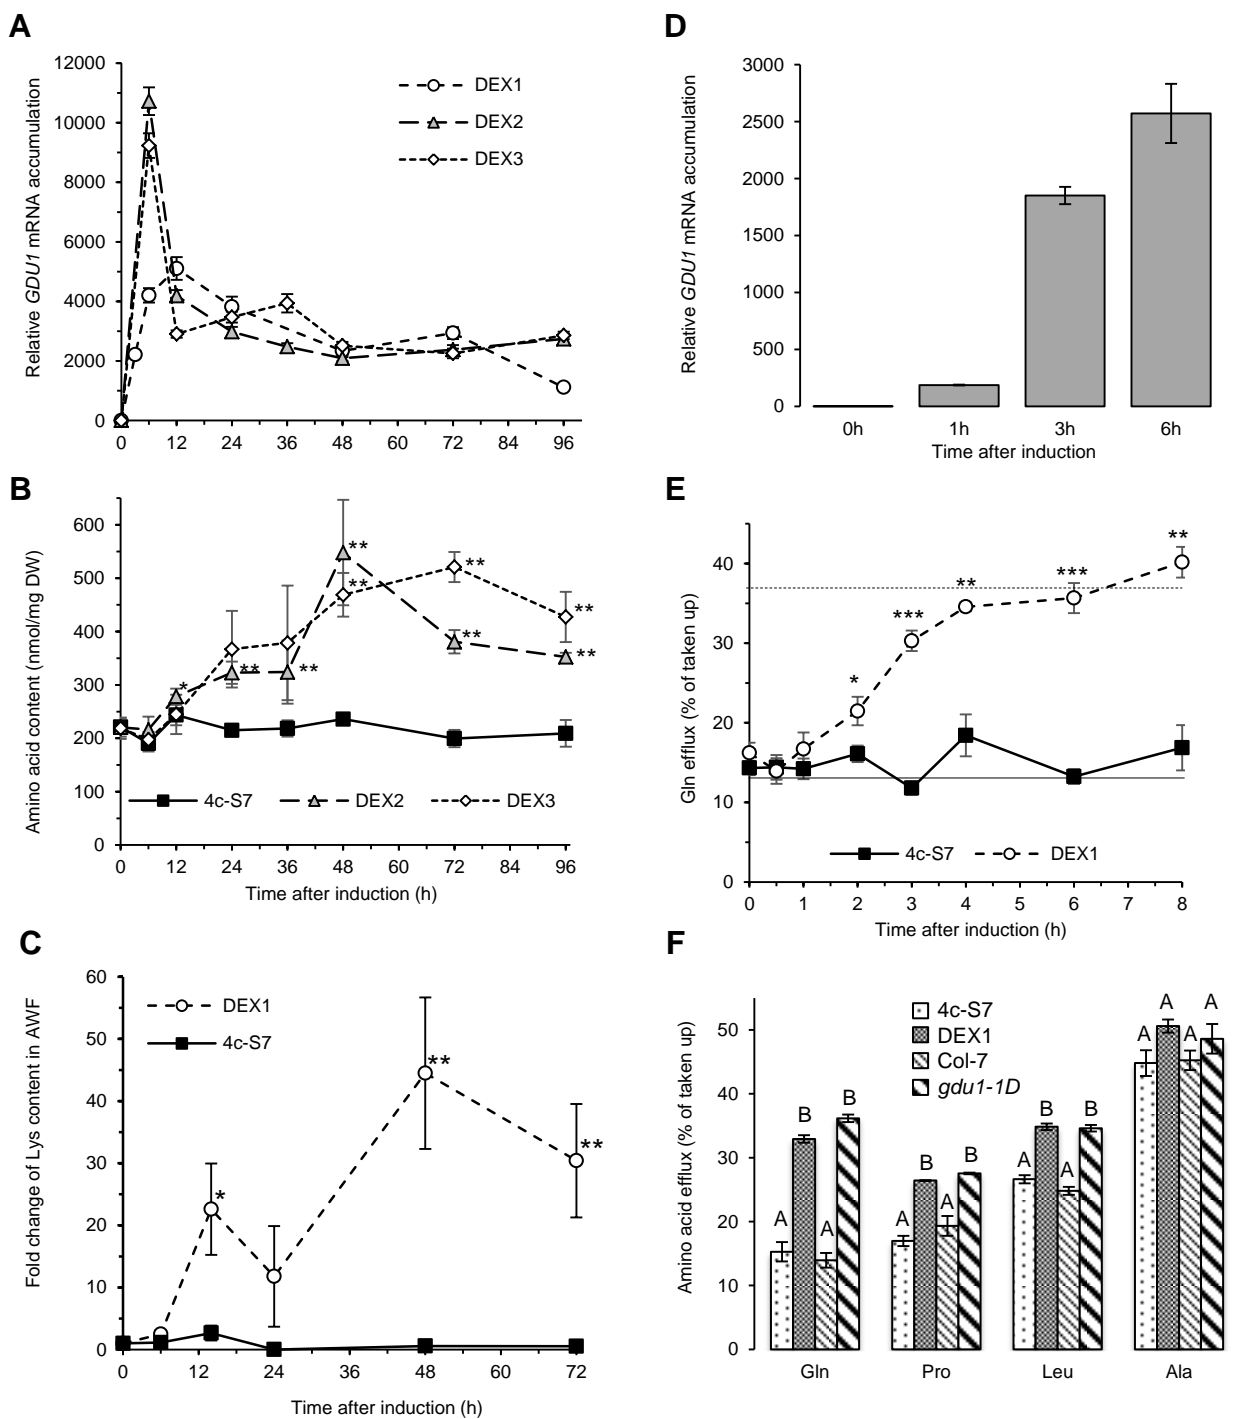

**Figure 1. Time course analysis of *GDU1* transcript and amino acid levels, and amino acid export after induction of *GDU1*.**

**A.** Lines DEX1, DEX2, DEX3 and the pBIN-LhGR-N activator line 4c-S7 (control line) were grown for three weeks in soil, and sprayed with dexamethasone. *GDU1* mRNA accumulation was measured by qPCR over the course of four days after induction. Line DEX1 was tested in a separate experiment as lines DEX2 and DEX3. Relative levels are reported as fold change compared to the 4c-S7 line at each time point, set at 1. Error bars=SE, n=3 biological replicates. **B.** Free amino acid levels in whole leaves from the same samples as in A. Error bars=SE, n=3 biological replicates. Statistically different changes from the 4c-S7 line: t-test (\* p<0.1; \*\* p<0.05). **C.** Changes in Lys content in apoplasmic wash fluid (AWF) of lines DEX1 and 4c-S7 grown for four weeks on soil and sprayed with dexamethasone. Levels are reported as relative to those time 0 for each line, set at 1. Error bars=SE, n=4 biological replicates. Statistically different changes from the 4c-S7 line: t-test (\* p<0.1; \*\* p<0.05). **D, E and F.** The 4c-S7 and DEX1 lines were grown on half strength MS +1% sucrose for one week, followed by four additional days in liquid medium, and treated with 30  $\mu$ M dexamethasone for times indicated on the graphs. **D.** Fold changes in *GDU1* transcript levels in the DEX1 line compared to the 4c-S7 line at each time point (set at 1). Error bars = SE, n=3 biological replicates. **E.** Measurement of Gln efflux over time after *GDU1* induction. Statistically different changes from the 4c-S7 line: t-test (\* p<0.05, \*\* p<0.01, \*\*\* p<0.001). The dashed and plain horizontal lines correspond to the Gln efflux of *gdu1-1D* and Col-7 respectively, measured under the same conditions. Error bars=SE, n=3-6 biological replicates. **F.** Efflux of Gln, Pro, Leu, and Ala (measured for 20 min after 20 min uptake of 1 mmol.l<sup>-1</sup> of each amino acid) at three hours after dexamethasone treatment on the 4c-S7 and DEX1 lines, and in Col-7 and *gdu1-1D* lines. Different letters indicate significantly different results for each amino acid (ANOVA-Tukey, p<0.05). Error bars=SE, n=3 biological replicates.

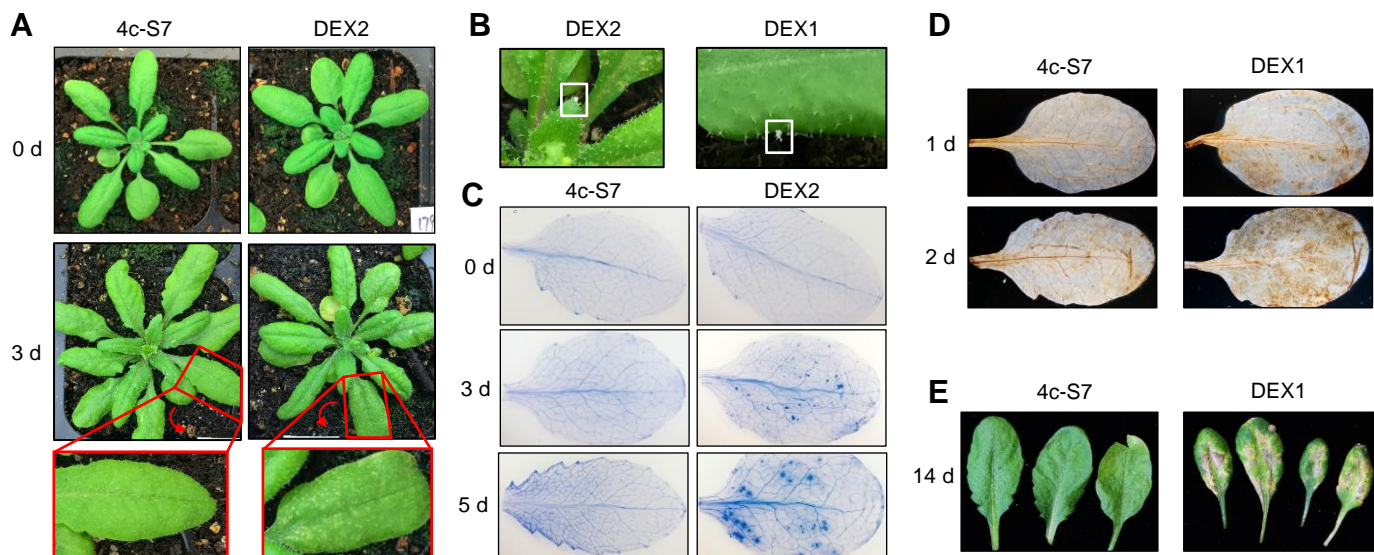

**Figure 2. Visible phenotypes of the DEX and 4c-S7 plants after spraying with dexamethasone.**

**A.** Picture of DEX2 and 4c-S7 plants at 0 and 3 days after induction. Red boxes: enlargement of the leaves at 3 days, showing the development of lesions in DEX2 only (arrows indicate the direction of rotation). **B.** Close-up view of leaves of DEX1 and DEX2, three days after induction, showing Gln secretion (white boxes). **C.** Leaves of 4c-S7 and DEX2 plants, 0, 3 and 5 days after induction, stained using Trypan blue to reveal cell death. **D.** Leaves of 4c-S7 and DEX1 plants, 1 and 2 days after induction, stained with diaminobenzidine to reveal the presence of ROS. **E.** Leaves of 4c-S7 and DEX1 plants, 14 days after induction (induction was repeated 7 days after the first spray).

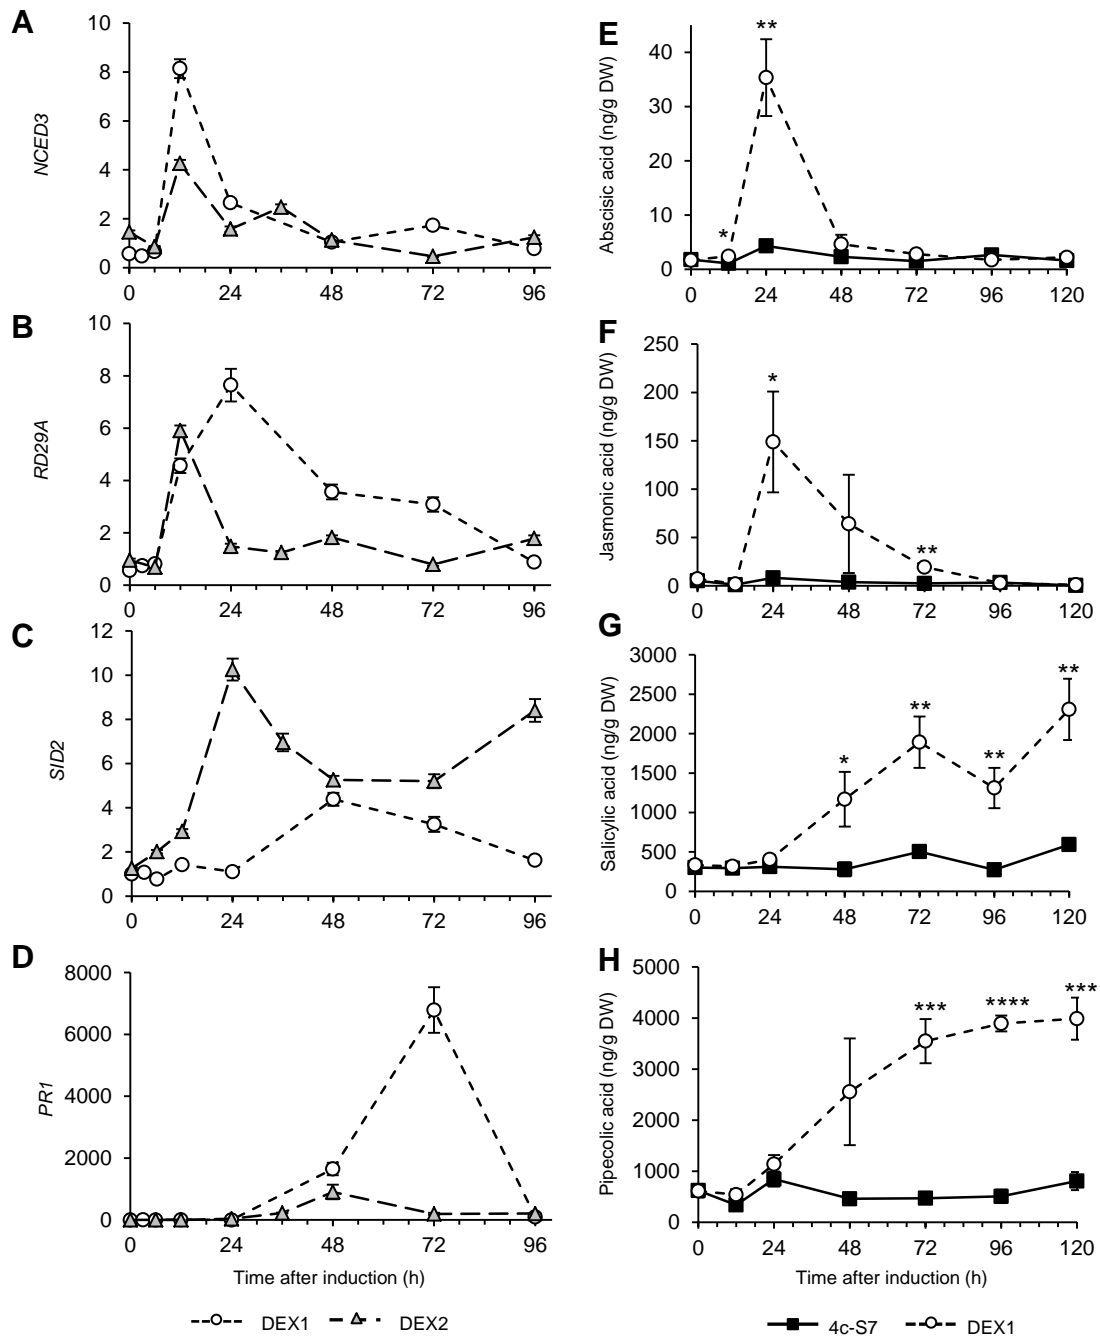

**Figure 3. Time course analysis of the expression of marker genes and of the accumulation of phytohormones following *GDU1* induction.**

**A to D.** DEX1 and DEX2 lines were induced in two separate experiments reported in Figure 1A. Data represent fold differences of the transcript levels for each gene relative to those in the control 4c-S7 line at the corresponding time point, set at 1. *NCED3* (A) and *RD29A* (B), markers for ABA synthesis and signaling; *SID2* (C) and *PR1* (D), markers for SA synthesis and signaling, respectively. Raw data are presented in Supplemental Figure 3. Error bars are SE, N=3 biological replicates. **E to H.** 4c-S7 and DEX1 plants were grown for three weeks in soil, sprayed with dexamethasone. Phytohormone levels were measured by LC-MS. (E) Abscisic acid; (F) Jasmonic acid; (G) Salicylic acid; (H) Pipepicolic acid. Error bars=SE, n=4 biological replicates. Statistically different results from 4c-S7: t-test (\*  $p < 0.05$ , \*\*  $p < 0.01$ , \*\*\*  $p < 0.001$ , \*\*\*\*  $p < 0.0001$ ).

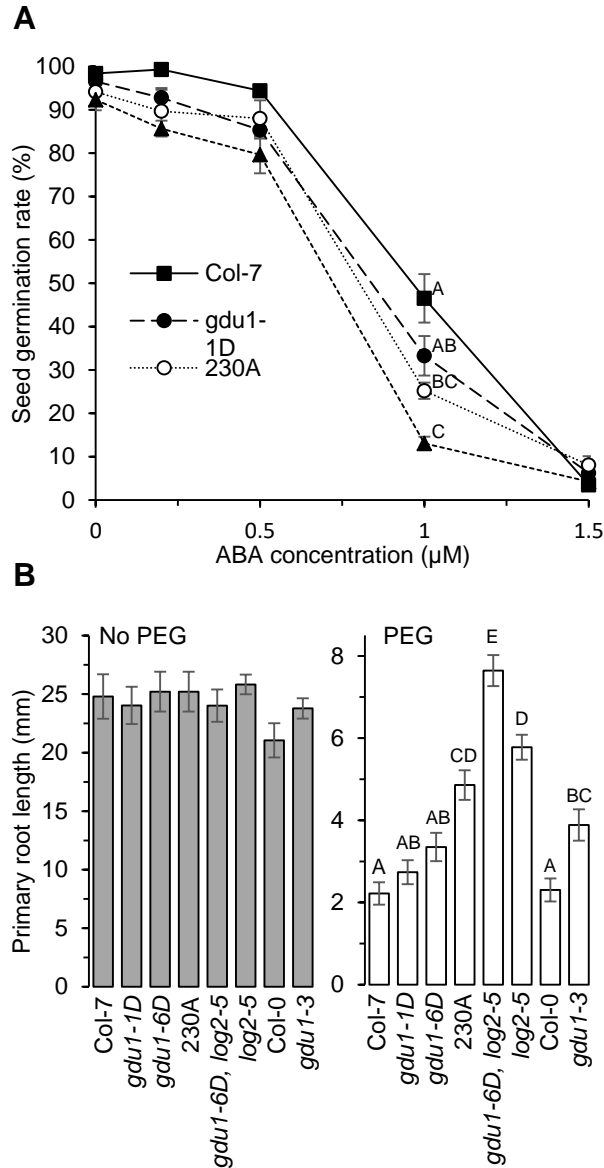

**Figure 4. Sensitivity to ABA and drought of plants altered in *GDU1* and/or *LOG2* expression.**

**A.** Germination rate of Col-7, *gdu1-1D*, *gdu1-6D* and *gdu1-1D* expressing an amiRNA targeting *LOG2* (230A). Plants were grown for five days on half strength MS with 1% sucrose containing various concentrations of ABA indicated in the figure. Germination was assessed as cotyledon greening. Error bars=SE, n=3 biological replicates consisting of 60-240 seedlings each. **B.** Length of the primary root of plants grown for seven days on PEG-containing (mimic drought) or PEG-free (control) medium. *gdu1-3* is a T-DNA knockout mutant of *GDU1*, *log2-5* is a suppressor mutation of the *Gdu1D* phenotype of line *gdu1-6D* (Pratelli and Pilot, unpublished). Error bars=SE, n=18. Different letters for the PEG conditions indicate significantly different results (ANOVA-Tukey HSD,  $p < 0.05$ ).

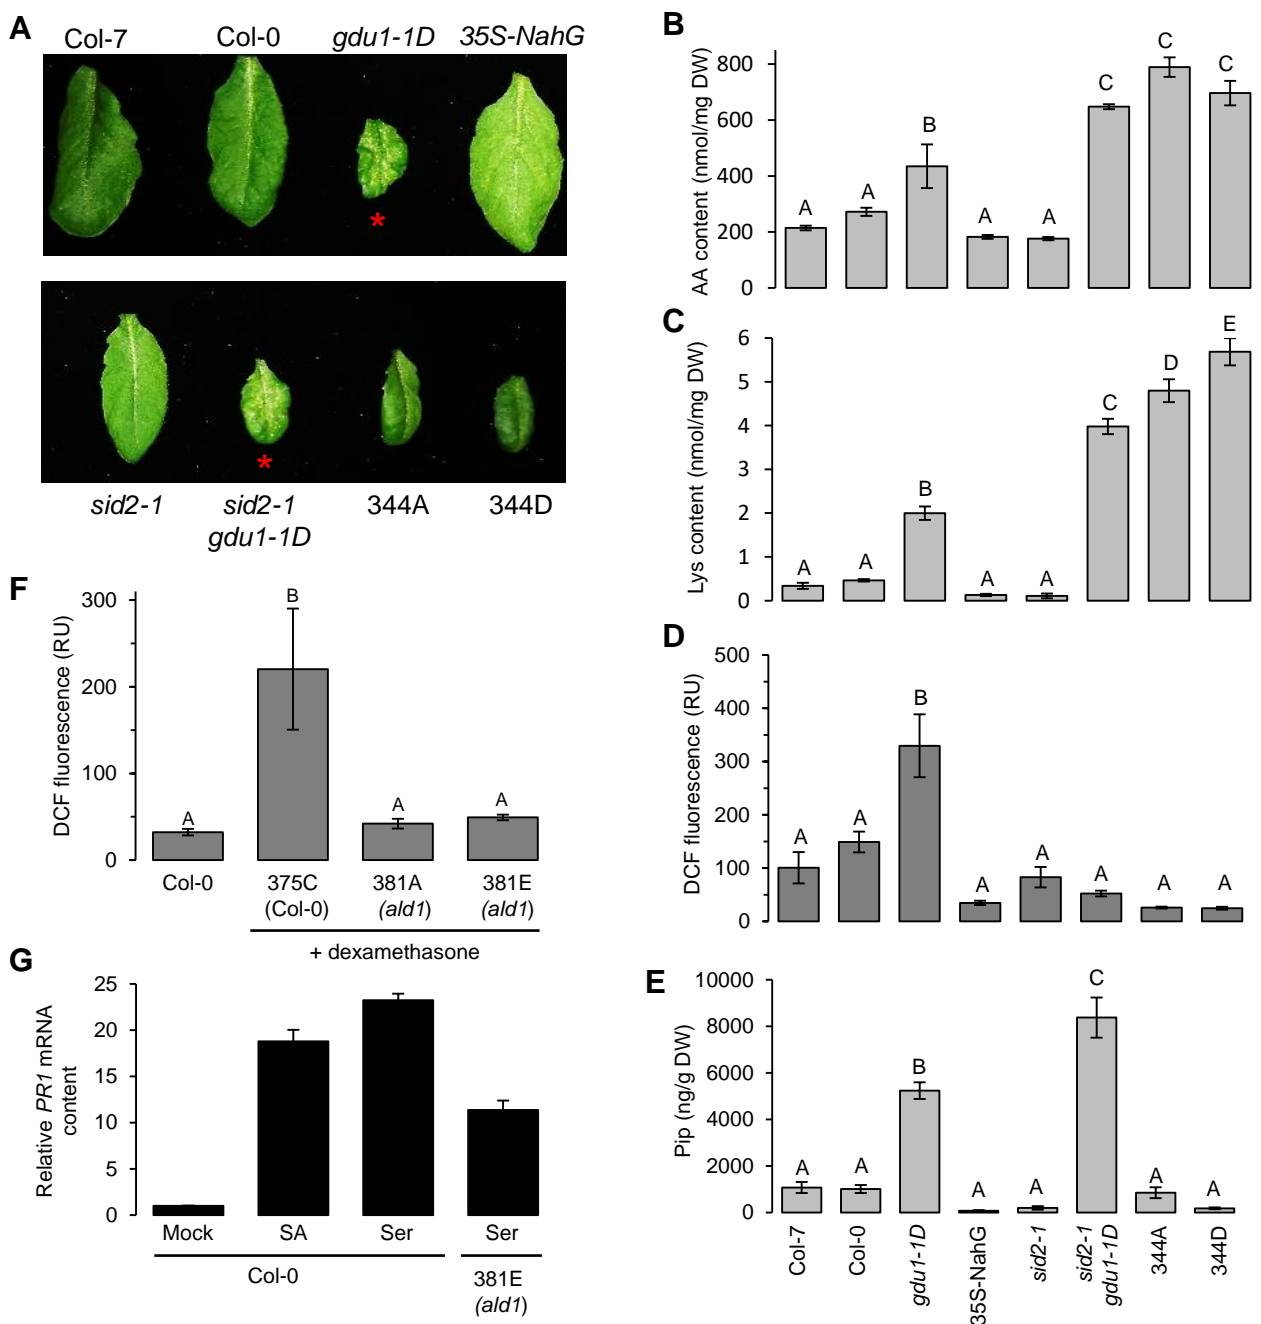

**Figure 5. Modification of the visible phenotypes of *gdu1-1D* plants by genetic suppression of defense responses.**

Wild type (Col-0, Col-7), *gdu1-1D*, *sid2-1* and the corresponding double mutant, plants over-expressing *NahG* (35S-NahG), and two independent lines coming from the transformation of *gdu1-1D* with the CsVMV-NahG construct (344A and 344D), were grown for five weeks in soil. **A.** Image of a typical leaf from each plant. Red asterisks indicate leaves with lesions. **B.** Total free amino acid (AA) levels in leaves of the plants. Error bars=SE, n=4, see also Supplemental Table 3. **C.** Free Lys levels in leaves of the plants. Error bars=SE, n=4. **D.** ROS levels in leaves of each of the lines; RU, relative units. Error bars=SE, n=3-8. **E.** Pip content in leaves of each of the lines. Error bars=SE, n=4. Different letters indicate significantly different results (ANOVA-Tukey HSD, p<0.05). **F.** Col-0 and *ald1* were transformed with a construct leading to the dexamethasone-inducible expression of *GDU1* (see Methods), to yield line 375C (Col-0), and two independent lines 381A and 381E (*ald1*). Lines were grown for four weeks on soil, sprayed with dexamethasone (+DEX) and leaf samples were collected after five days for ROS quantitation. Error bars=SE, n=4-12, different letters indicate significantly different results (Kruskal-Wallis - Dunn's tests, p<0.1). **G.** Plants were grown for eight days in half strength MS + 1 % sucrose and three additional days in liquid medium. Ser was added to the medium to a final concentration of 5 mM and samples were taken after 2 days. Treatment with 5  $\mu$ M SA for 2 days was used as a positive control. Fold changes in *PR1* transcript levels are expressed relative to the levels in Col-0 plants treated with 0.025% DMSO, set at 1. Error bars=SE, n=4 biological replicates.

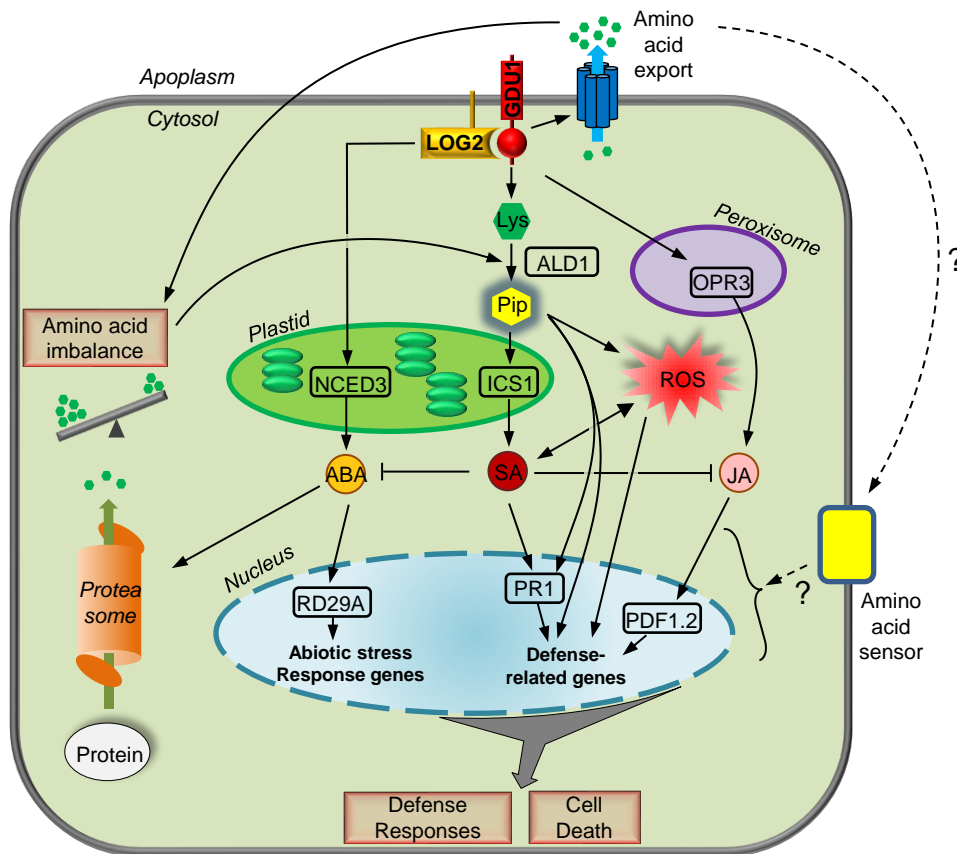

**Figure 6. Model for the processes activated upon *GDU1* over-expression.** Boxed genes correspond to the main marker genes assayed for expression in Figure 3 and Suppl. Figure 3. Arrows represent activation, and bars represent inhibition. Solid lines indicate confirmed links from this and previous studies, and dashed lines indicate possible links. See main text for details.

## Parsed Citations

- Alonso JM, Stepanova AN, Leisse TJ, Kim CJ, Chen H, Shinn P, Stevenson DK, Zimmerman J, Barajas P, Cheuk R, et al. (2003) **Genome-wide insertional mutagenesis of *Arabidopsis thaliana***. *Science* 301: 653-657  
Google Scholar: [Author Only](#) [Title Only](#) [Author and Title](#)
- Balanza V, Martinez-Fernandez I, Sato S, Yanofsky MF, Kaufmann K, Angenent GC, Berner M, Ferrandiz C (2018) **Genetic control of meristem arrest and life span in *Arabidopsis* by a FRUITFULL-APETALA2 pathway**. *Nature Commun* 9: 565  
Google Scholar: [Author Only](#) [Title Only](#) [Author and Title](#)
- Bargmann BO, Marshall-Colon A, Efroni I, Ruffel S, Birnbaum KD, Coruzzi GM, Krouk G (2013) **TARGET: a transient transformation system for genome-wide transcription factor target discovery**. *Mol Plant* 6: 978-980  
Google Scholar: [Author Only](#) [Title Only](#) [Author and Title](#)
- Bernsdorff F, Doring AC, Gruner K, Schuck S, Brautigam A, Zeier J (2016) **Pipecolic Acid Orchestrates Plant Systemic Acquired Resistance and Defense Priming via Salicylic Acid-Dependent and -Independent Pathways**. *Plant Cell* 28: 102-129  
Google Scholar: [Author Only](#) [Title Only](#) [Author and Title](#)
- Bowling SA, Guo A, Cao H, Gordon AS, Klessig DF, Dong X (1994) **A mutation in *Arabidopsis* that leads to constitutive expression of systemic acquired resistance**. *Plant Cell* 6: 1845-1857  
Google Scholar: [Author Only](#) [Title Only](#) [Author and Title](#)
- Brooks MD, Cirrone J, Pasquino AV, Alvarez JM, Swift J, Mittal S, Juang CL, Varala K, Gutierrez RA, Krouk G, et al. (2019) **Network Walking charts transcriptional dynamics of nitrogen signaling by integrating validated and predicted genome-wide interactions**. *Nature Commun* 10: 1569  
Google Scholar: [Author Only](#) [Title Only](#) [Author and Title](#)
- Checker VG, Kushwaha HR, Kumari P, Yadav S (2018) **Role of Phytohormones in Plant Defense: Signaling and Cross Talk**. In A Singh, IK Singh, eds, *Molecular Aspects of Plant-Pathogen Interaction*. Springer Singapore, Singapore, pp 159-184  
Google Scholar: [Author Only](#) [Title Only](#) [Author and Title](#)
- Chen H, Zhang Z, Teng K, Lai J, Zhang Y, Huang Y, Li Y, Liang L, Wang Y, Chu C, et al. (2010) **Up-regulation of LSB1/GDU3 affects geminivirus infection by activating the salicylic acid pathway**. *Plant J* 62: 12-23  
Google Scholar: [Author Only](#) [Title Only](#) [Author and Title](#)
- Chen YC, Holmes EC, Rajniak J, Kim JG, Tang S, Fischer CR, Mudgett MB, Sattely ES (2018) **N-hydroxy-pipecolic acid is a mobile metabolite that induces systemic disease resistance in *Arabidopsis***. *Proc Natl Acad Sci USA* 115: E4920-E4929  
Google Scholar: [Author Only](#) [Title Only](#) [Author and Title](#)
- Clough SJ, Bent AF (1998) **Floral dip: a simplified method for *Agrobacterium*-mediated transformation of *Arabidopsis thaliana***. *Plant J* 16: 735-743  
Google Scholar: [Author Only](#) [Title Only](#) [Author and Title](#)
- Collakova E, Aghamirzaie D, Fang Y, Klumas C, Tabataba F, Kakumanu A, Myers E, Heath LS, Grene R (2013) **Metabolic and Transcriptional Reprogramming in Developing Soybean (*Glycine max*) Embryos**. *Metabolites* 3: 347-372  
Google Scholar: [Author Only](#) [Title Only](#) [Author and Title](#)
- Coruzzi G, Last RL, Dudareva N, Amrhein N (2015) **Amino Acids**. In BB Buchanan, W Gruissen, RL Jones, eds, *Biochemistry and molecular biology of plants*. American Society of Plant Physiologists, Rockville, MD, pp 289-336  
Google Scholar: [Author Only](#) [Title Only](#) [Author and Title](#)
- Craft J, Samalova M, Baroux C, Townley H, Martinez A, Jepson I, Tsiantis M, Moore I (2005) **New pOp/LhG4 vectors for stringent glucocorticoid-dependent transgene expression in *Arabidopsis***. *Plant J* 41: 899-918  
Google Scholar: [Author Only](#) [Title Only](#) [Author and Title](#)
- Dannel F, Pfeffer H, Marschner H (1995) **Isolation of Apoplasmic Fluid from Sunflower Leaves and its Use for Studies on Influence of Nitrogen Supply on Apoplasmic pH**. *J Plant Physiol* 146: 273-278  
Google Scholar: [Author Only](#) [Title Only](#) [Author and Title](#)
- de Torres Zabala M, Bennett MH, Truman WH, Grant MR (2009) **Antagonism between salicylic and abscisic acid reflects early host-pathogen conflict and moulds plant defence responses**. *Plant J* 59: 375-386  
Google Scholar: [Author Only](#) [Title Only](#) [Author and Title](#)
- Delaney TP, Uknes S, Vernooij B, Friedrich L, Weymann K, Negrotto D, Gaffney T, Gut-Rella M, Kessmann H, Ward E, et al. (1994) **A central role of salicylic Acid in plant disease resistance**. *Science* 266: 1247-1250  
Google Scholar: [Author Only](#) [Title Only](#) [Author and Title](#)
- Derrick PM, Barker H, Oparka KJ (1992) **Increase in Plasmodesmatal Permeability during Cell-to-Cell Spread of Tobacco Rattle Virus from Individually Inoculated Cells**. *Plant Cell* 4: 1405-1412  
Google Scholar: [Author Only](#) [Title Only](#) [Author and Title](#)
- Dinkeloo K, Boyd S, Pilot G (2018) **Update on amino acid transporter functions and on possible amino acid sensing mechanisms in plants**. *Semin Cell Dev Biol* 74: 105-113



Google Scholar: [Author Only](#) [Title Only](#) [Author and Title](#)

**Fagard M, Launay A, Clement G, Courtial J, Dellagi A, Farjad M, Krapp A, Soulie MC, Masclaux-Daubresse C (2014) Nitrogen metabolism meets phytopathology. J Exp Bot 65: 5643-5656**

Google Scholar: [Author Only](#) [Title Only](#) [Author and Title](#)

**Forcat S, Bennett MH, Mansfield JW, Grant MR (2008) A rapid and robust method for simultaneously measuring changes in the phytohormones ABA, JA and SA in plants following biotic and abiotic stress. Plant Methods 4: 16**

Google Scholar: [Author Only](#) [Title Only](#) [Author and Title](#)

**Forde BG, Roberts MR (2014) Glutamate receptor-like channels in plants: a role as amino acid sensors in plant defence? F1000Prime Reports 6: 37**

**Gent L, Forde BG (2017) How do plants sense their nitrogen status? J Exp Bot 68: 2531-2539**

Google Scholar: [Author Only](#) [Title Only](#) [Author and Title](#)

**Goto Y, Maki N, Ichihashi Y, Kitazawa D, Igarashi D, Kadota Y, Shirasu K (2020) Exogenous treatment with glutamate induces immune responses in Arabidopsis. Mol Plant Microbe Interact 33: 474-487**

Google Scholar: [Author Only](#) [Title Only](#) [Author and Title](#)

**Gou M, Su N, Zheng J, Huai J, Wu G, Zhao J, He J, Tang D, Yang S, Wang G (2009) An F-box gene, CPR30, functions as a negative regulator of the defense response in Arabidopsis. Plant J 60: 757-770**

Google Scholar: [Author Only](#) [Title Only](#) [Author and Title](#)

**Guerra D, Chapiro SM, Pratelli R, Yu S, Jia W, Leary J, Pilot G, Callis J (2017) Control of Amino Acid Homeostasis by a Ubiquitin Ligase-Coactivator Protein Complex. J Biol Chem 292: 3827-3840**

Google Scholar: [Author Only](#) [Title Only](#) [Author and Title](#)

**Gupta A, Hisano H, Hojo Y, Matsuura T, Ikeda Y, Mori IC, Senthil-Kumar M (2017) Global profiling of phytohormone dynamics during combined drought and pathogen stress in Arabidopsis thaliana reveals ABA and JA as major regulators. Scientific reports 7: 4017**

Google Scholar: [Author Only](#) [Title Only](#) [Author and Title](#)

**Hannah MA, Caldana C, Steinhäuser D, Balbo I, Fernie AR, Willmitzer L (2010) Combined transcript and metabolite profiling of Arabidopsis grown under widely variant growth conditions facilitates the identification of novel metabolite-mediated regulation of gene expression. Plant Physiol 152: 2120-2129**

Google Scholar: [Author Only](#) [Title Only](#) [Author and Title](#)

**Harrison MA (2012) Cross-Talk Between Phytohormone Signaling Pathways Under Both Optimal and Stressful Environmental Conditions. In NA Khan, R Nazar, N Iqbal, NA Anjum, eds, Phytohormones and Abiotic Stress Tolerance in Plants. Springer Berlin Heidelberg, Berlin, Heidelberg, pp 49-76**

Google Scholar: [Author Only](#) [Title Only](#) [Author and Title](#)

**Hartmann M, Zeier J (2019) N-hydroxypipecolic acid and salicylic acid: a metabolic duo for systemic acquired resistance. Curr Opin Plant Biol 50: 44-57**

Google Scholar: [Author Only](#) [Title Only](#) [Author and Title](#)

**Hartmann M, Zeier T, Bernsdorff F, Reichel-Deland V, Kim D, Hohmann M, Scholten N, Schuck S, Brautigam A, Holzel T, et al. (2018) Flavin Monooxygenase-Generated N-Hydroxypipecolic Acid Is a Critical Element of Plant Systemic Immunity. Cell 173: 456-469 e416**

Google Scholar: [Author Only](#) [Title Only](#) [Author and Title](#)

**Heck S, Grau T, Buchala A, Metraux J-P, Nawrath C (2003) Genetic evidence that expression of NahG modifies defence pathways independent of salicylic acid biosynthesis in the Arabidopsis-Pseudomonas syringae pv. tomato interaction. Plant J 36: 342-352**

Google Scholar: [Author Only](#) [Title Only](#) [Author and Title](#)

**Hirschberg K, Miller CM, Ellenberg J, Presley JF, Siggia ED, Phair RD, Lippincott-Schwartz J (1998) Kinetic analysis of secretory protein traffic and characterization of golgi to plasma membrane transport intermediates in living cells. Journal of Cell Biology 143: 1485-1503**

Google Scholar: [Author Only](#) [Title Only](#) [Author and Title](#)

**Huang T, Jander G (2017) Abscisic acid-regulated protein degradation causes osmotic stress-induced accumulation of branched-chain amino acids in Arabidopsis thaliana. Planta 246: 737-747**

Google Scholar: [Author Only](#) [Title Only](#) [Author and Title](#)

**Jiang D, Berger F (2017) DNA replication-coupled histone modification maintains Polycomb gene silencing in plants. Science 357: 1146-1149**

Google Scholar: [Author Only](#) [Title Only](#) [Author and Title](#)

**Kadotani N, Akagi A, Takatsuji H, Miwa T, Igarashi D (2016) Exogenous proteinogenic amino acids induce systemic resistance in rice. BMC Plant Biol 16: 60**

Google Scholar: [Author Only](#) [Title Only](#) [Author and Title](#)

**Kan CC, Chung TY, Juo YA, Hsieh MH (2015) Glutamine rapidly induces the expression of key transcription factor genes involved in nitrogen and stress responses in rice roots. BMC Genomics 16: 731**

Google Scholar: [Author Only](#) [Title Only](#) [Author and Title](#)

- Kan CC, Chung TY, Wu HY, Juo YA, Hsieh MH (2017) Exogenous glutamate rapidly induces the expression of genes involved in metabolism and defense responses in rice roots. *BMC Genomics* 18: 186  
Google Scholar: [Author Only](#) [Title Only](#) [Author and Title](#)
- Kim JH, Kim WT (2013) The Arabidopsis RING E3 Ubiquitin Ligase AtARP3/LOG2 Participates in Positive Regulation of High-Salt and Drought Stress Responses. *Plant Physiol* 162: 1733-1749  
Google Scholar: [Author Only](#) [Title Only](#) [Author and Title](#)
- Kovacs Z, Simon-Sarkadi L, Sovany C, Kirsch K, Galiba G, Kocsy G (2011) Differential effects of cold acclimation and abscisic acid on free amino acid composition in wheat. *Plant Sci* 180: 61-68  
Google Scholar: [Author Only](#) [Title Only](#) [Author and Title](#)
- Lagarde D, Basset M, Lepetit M, Conejero G, Gaymard F, Astruc S, Grignon C (1996) Tissue-specific expression of Arabidopsis AKT1 gene is consistent with a role in K<sup>+</sup> nutrition. *Plant J* 9: 195-203  
Google Scholar: [Author Only](#) [Title Only](#) [Author and Title](#)
- Lamp N, Alkan N, Davydov O, Fluhr R (2013) Set-point control of RD21 protease activity by AtSerpin1 controls cell death in Arabidopsis. *Plant J* 74: 498-510  
Google Scholar: [Author Only](#) [Title Only](#) [Author and Title](#)
- Less H, Galili G (2008) Principal transcriptional programs regulating plant amino acid metabolism in response to abiotic stresses. *Plant Physiol* 147: 316-330  
Google Scholar: [Author Only](#) [Title Only](#) [Author and Title](#)
- Liu G, Ji Y, Bhuiyan NH, Pilot G, Selvaraj G, Zou J, Wei Y (2010) Amino acid homeostasis modulates salicylic acid-associated redox status and defense responses in Arabidopsis. *Plant Cell* 22: 3845-3863  
Google Scholar: [Author Only](#) [Title Only](#) [Author and Title](#)
- Malinowski R, Kasprzewska A, Fleming AJ (2011) Targeted manipulation of leaf form via local growth repression. *Plant J* 66: 941-952  
Google Scholar: [Author Only](#) [Title Only](#) [Author and Title](#)
- Manohar M, Wang D, Manosalva PM, Choi HW, Kombrink E, Klessig DF (2017) Members of the abscisic acid co-receptor PP2C protein family mediate salicylic acid-abscisic acid crosstalk. *Plant Direct* 1: e00020  
Google Scholar: [Author Only](#) [Title Only](#) [Author and Title](#)
- McDowell JM, Hoff T, Anderson RG, Deegan D (2011) Propagation, storage, and assays with *Hyaloperonospora arabidopsidis*: A model oomycete pathogen of Arabidopsis. In JM McDowell, ed, *Plant Immunity. Methods in Molecular Biology (Methods and Protocols). Methods in Molecular Biology*. Ed 2011/03/02. Vol 712. Humana Press, pp 137-151  
Google Scholar: [Author Only](#) [Title Only](#) [Author and Title](#)
- Moore I, Samalova M, Kurup S (2006) Transactivated and chemically inducible gene expression in plants. *Plant J* 45: 651-683  
Google Scholar: [Author Only](#) [Title Only](#) [Author and Title](#)
- Mosher S, Moeder W, Nishimura N, Jikumaru Y, Joo SH, Urquhart W, Klessig DF, Kim SK, Nambara E, Yoshioka K (2010) The lesion-mimic mutant *cpr22* shows alterations in abscisic acid signaling and abscisic acid insensitivity in a salicylic acid-dependent manner. *Plant Physiol* 152: 1901-1913  
Google Scholar: [Author Only](#) [Title Only](#) [Author and Title](#)
- Mur LAJ, Simpson C, Kumari A, Gupta AK, Gupta KJ (2017) Moving nitrogen to the centre of plant defence against pathogens. *Ann Bot* 119: 703-709  
Google Scholar: [Author Only](#) [Title Only](#) [Author and Title](#)
- Navarova H, Bernsdorff F, Doring AC, Zeier J (2012) Pipecolic acid, an endogenous mediator of defense amplification and priming, is a critical regulator of inducible plant immunity. *Plant Cell* 24: 5123-5141  
Google Scholar: [Author Only](#) [Title Only](#) [Author and Title](#)
- Nimchuk Z, Eulgem T, Holt BF, 3rd, Dangl JL (2003) Recognition and response in the plant immune system. *Annu Rev Genet* 37: 579-609  
Google Scholar: [Author Only](#) [Title Only](#) [Author and Title](#)
- Pilot G, Stransky H, Bushey DF, Pratelli R, Ludewig U, Wingate VP, Frommer WB (2004) Overexpression of GLUTAMINE DUMPER1 leads to hypersecretion of glutamine from hydathodes of Arabidopsis leaves. *Plant Cell* 16: 1827-1840  
Google Scholar: [Author Only](#) [Title Only](#) [Author and Title](#)
- Pogany M, von Rad U, Grun S, Dongo A, Pintye A, Simoneau P, Bahnweg G, Kiss L, Barna B, Durner J (2009) Dual roles of reactive oxygen species and NADPH oxidase RBOHD in an Arabidopsis-*Alternaria* pathosystem. *Plant Physiol* 151: 1459-1475  
Google Scholar: [Author Only](#) [Title Only](#) [Author and Title](#)
- Pogorelko GV, Juvale PS, Rutter WB, Hutten M, Maier TR, Hewezi T, Paulus J, van der Hoorn RA, Grundler FM, Siddique S, et al. (2019) Re-targeting of a plant defense protease by a cyst nematode effector. *Plant J* 98: 1000-1014  
Google Scholar: [Author Only](#) [Title Only](#) [Author and Title](#)
- Pratelli R, Guerra DD, Yu S, Wogulis M, Kraft E, Frommer WB, Callis J, Pilot G (2012) The ubiquitin E3 ligase LOSS OF GDU2 is required for GLUTAMINE DUMPER1-induced amino acid secretion in Arabidopsis. *Plant Physiol* 158: 1628-1642

Google Scholar: [Author Only](#) [Title Only](#) [Author and Title](#)

**Pratelli R, Pilot G (2006) The plant-specific VIMAG domain of Glutamine Dumper1 is necessary for the function of the protein in arabidopsis. FEBS Lett 580: 6961-6966**

Google Scholar: [Author Only](#) [Title Only](#) [Author and Title](#)

**Pratelli R, Pilot G (2007) Altered amino acid metabolism in glutamine dumper1 plants. Plant Signal Behav 2: 182-184**

Google Scholar: [Author Only](#) [Title Only](#) [Author and Title](#)

**Pratelli R, Pilot G (2014) Regulation of amino acid metabolic enzymes and transporters in plants. J Exp Bot 65: 5535-5556**

Google Scholar: [Author Only](#) [Title Only](#) [Author and Title](#)

**Pratelli R, Voll LM, Horst RJ, Frommer WB, Pilot G (2010) Stimulation of nonselective amino acid export by glutamine dumper proteins. Plant Physiol 152: 762-773**

Google Scholar: [Author Only](#) [Title Only](#) [Author and Title](#)

**Rowe JH, Topping JF, Liu J, Lindsey K (2016) Abscisic acid regulates root growth under osmotic stress conditions via an interacting hormonal network with cytokinin, ethylene and auxin. New Phytol 211: 225-239**

Google Scholar: [Author Only](#) [Title Only](#) [Author and Title](#)

**Samalova M, Brzobohaty B, Moore I (2005) pOp6/LhGR: a stringently regulated and highly responsive dexamethasone-inducible gene expression system for tobacco. Plant J 41: 919-935**

Google Scholar: [Author Only](#) [Title Only](#) [Author and Title](#)

**Schneider CA, Rasband WS, Eliceiri KW (2012) NIH Image to ImageJ: 25 years of image analysis. Nat Methods 9: 671-675**

Google Scholar: [Author Only](#) [Title Only](#) [Author and Title](#)

**Seo PJ, Park CM (2010) MYB96-mediated abscisic acid signals induce pathogen resistance response by promoting salicylic acid biosynthesis in Arabidopsis. New Phytol 186: 471-483**

Google Scholar: [Author Only](#) [Title Only](#) [Author and Title](#)

**Silva H, Yoshioka K, Dooner HK, Klessig DF (1999) Characterization of a new Arabidopsis mutant exhibiting enhanced disease resistance. Mol Plant Microbe Interact 12: 1053-1063**

Google Scholar: [Author Only](#) [Title Only](#) [Author and Title](#)

**Skalak J, Vercruyssen L, Claeys H, Hradilova J, Cerny M, Novak O, Plackova L, Saiz-Fernandez I, Skalakova P, Coppens F, et al. (2019) Multifaceted activity of cytokinin in leaf development shapes its size and structure in Arabidopsis. Plant J 97: 805-824**

Google Scholar: [Author Only](#) [Title Only](#) [Author and Title](#)

**Sonawala U, Dinkeloo K, Danna CH, McDowell JM, Pilot G (2018) Review: Functional linkages between amino acid transporters and plant responses to pathogens. Plant Sci 277: 79-88**

Google Scholar: [Author Only](#) [Title Only](#) [Author and Title](#)

**Sun Y, Wang M, Mur LAJ, Shen Q, Guo S (2020) Unravelling the Roles of Nitrogen Nutrition in Plant Disease Defences. Int J Mol Sci 21**

Google Scholar: [Author Only](#) [Title Only](#) [Author and Title](#)

**Tao Z, Shen L, Gu X, Wang Y, Yu H, He Y (2017) Embryonic epigenetic reprogramming by a pioneer transcription factor in plants. Nature 551: 124-128**

Google Scholar: [Author Only](#) [Title Only](#) [Author and Title](#)

**Tegeder M (2014) Transporters involved in source to sink partitioning of amino acids and ureides: opportunities for crop improvement. J Exp Bot 65: 1865-1878**

Google Scholar: [Author Only](#) [Title Only](#) [Author and Title](#)

**Toyota M, Spencer D, Sawai-Toyota S, Jiaqi W, Zhang T, Koo AJ, Howe GA, Gilroy S (2018) Glutamate triggers long-distance, calcium-based plant defense signaling. Science 361: 1112-1115**

Google Scholar: [Author Only](#) [Title Only](#) [Author and Title](#)

**Truman W, Bennett MH, Kubigsteltig I, Turnbull C, Grant M (2007) Arabidopsis systemic immunity uses conserved defense signaling pathways and is mediated by jasmonates. Proc Natl Acad Sci USA 104: 1075-1080**

Google Scholar: [Author Only](#) [Title Only](#) [Author and Title](#)

**Ueno N, Kashiwagi M, Kanekatsu M, Marubashi W, Yamada T (2019) Accumulation of protein aggregates induces autolytic programmed cell death in hybrid tobacco cells expressing hybrid lethality. Scientific reports 9: 10223**

Google Scholar: [Author Only](#) [Title Only](#) [Author and Title](#)

**Umbach AL, Zarkovic J, Yu J, Ruckle ME, McIntosh L, Hock JJ, Bingham S, White SJ, George RM, Subbaiah CC, et al. (2012) Comparison of intact Arabidopsis thaliana leaf transcript profiles during treatment with inhibitors of mitochondrial electron transport and TCA cycle. PLoS One 7: e44339**

Google Scholar: [Author Only](#) [Title Only](#) [Author and Title](#)

**Urano K, Maruyama K, Ogata Y, Morishita Y, Takeda M, Sakurai N, Suzuki H, Saito K, Shibata D, Kobayashi M, et al. (2009) Characterization of the ABA-regulated global responses to dehydration in Arabidopsis by metabolomics. Plant J 57: 1065-1078**

Google Scholar: [Author Only](#) [Title Only](#) [Author and Title](#)

**Van Breusegem F, Dat JF (2006) Reactive oxygen species in plant cell death. *Plant Physiol* 141: 384-390**

Google Scholar: [Author Only](#) [Title Only](#) [Author and Title](#)

**van der Weele CM (2000) Growth of *Arabidopsis thaliana* seedlings under water deficit studied by control of water potential in nutrient-agar media. *J Exp Bot* 51: 1555-1562**

Google Scholar: [Author Only](#) [Title Only](#) [Author and Title](#)

**Wang C, Liu R, Lim GH, de Lorenzo L, Yu K, Zhang K, Hunt AG, Kachroo A, Kachroo P (2018) Pipecolic acid confers systemic immunity by regulating free radicals. *Science Advances* 4: eaar4509**

Google Scholar: [Author Only](#) [Title Only](#) [Author and Title](#)

**Wang M, Lee J, Choi B, Park Y, Sim HJ, Kim H, Hwang I (2018) Physiological and Molecular Processes Associated with Long Duration of ABA Treatment. *Front Plant Sci* 9: 176**

Google Scholar: [Author Only](#) [Title Only](#) [Author and Title](#)

**Wildermuth MC, Dewdney J, Wu G, Ausubel FM (2001) Isochorismate synthase is required to synthesize salicylic acid for plant defence. *Nature* 414: 562-565**

Google Scholar: [Author Only](#) [Title Only](#) [Author and Title](#)

**Yamaguchi N, Winter CM, Wellmer F, Wagner D (2015) Identification of direct targets of plant transcription factors using the GR fusion technique. *Methods Mol Biol* 1284: 123-138**

Google Scholar: [Author Only](#) [Title Only](#) [Author and Title](#)

**Yu S, Pilot G (2014) Testing the efficiency of plant artificial microRNAs by transient expression in *Nicotiana benthamiana* reveals additional action at the translational level. *Front Plant Sci* 5**

Google Scholar: [Author Only](#) [Title Only](#) [Author and Title](#)

**Yu S, Pratelli R, Denbow C, Pilot G (2015) Suppressor mutations in the Glutamine Dumper1 protein dissociate disturbance in amino acid transport from other characteristics of the Gdu1D phenotype. *Front Plant Sci* 6: 593**

Google Scholar: [Author Only](#) [Title Only](#) [Author and Title](#)

**Zeier J (2013) New insights into the regulation of plant immunity by amino acid metabolic pathways. *Plant Cell Environ* 36: 2085-2103**

Google Scholar: [Author Only](#) [Title Only](#) [Author and Title](#)
